# Supplementary material for: Primary and promiscuous functions coexist during evolutionary innovation through whole protein domain acquisitions
Source: eLife journal article supplement (doi:10.7554/elife.58061), 2020-12-15

**E103K & T118S**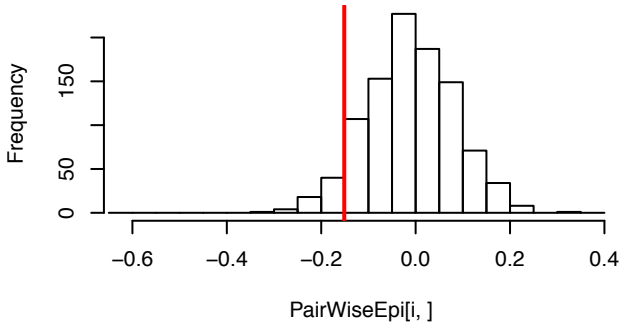**E103K & D161G**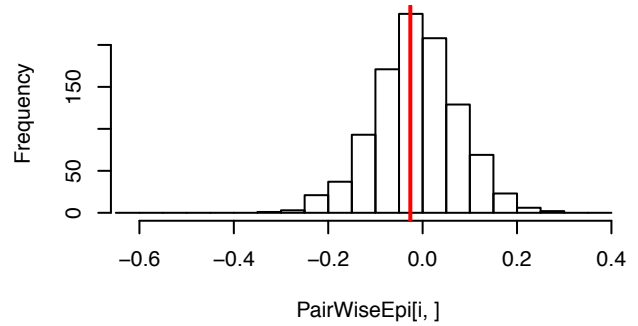**E103K & H162Q**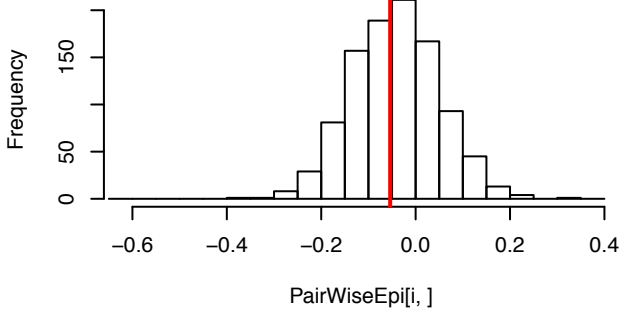**E103K & S173R**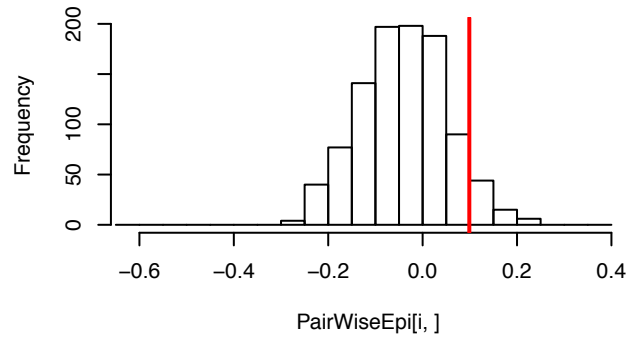**E103K & K219R**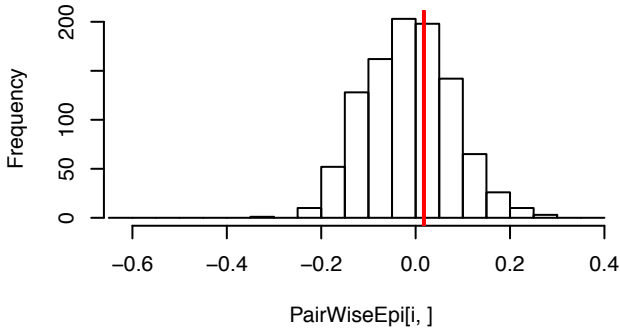**E103K & Y220N**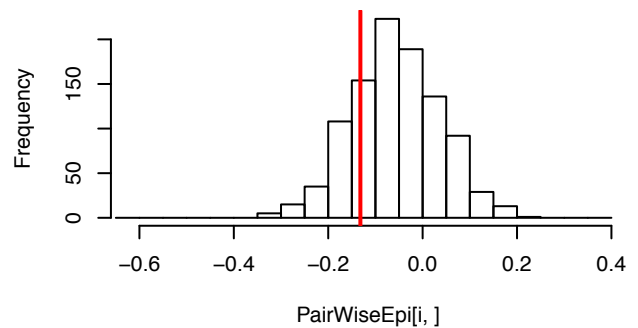

**E103K & D299E**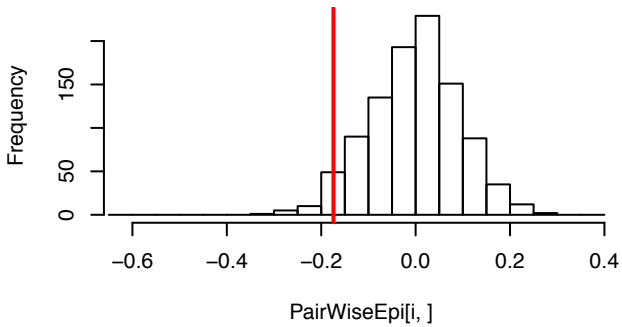**E103K & V315A**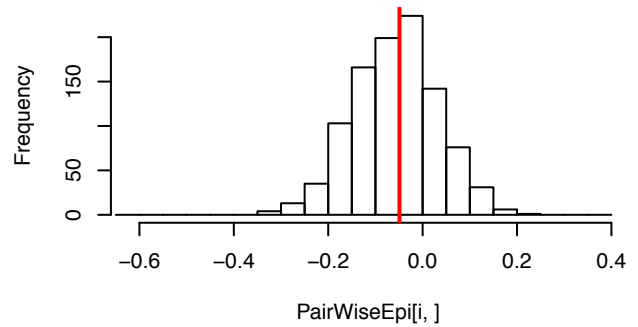**E103K & A321G**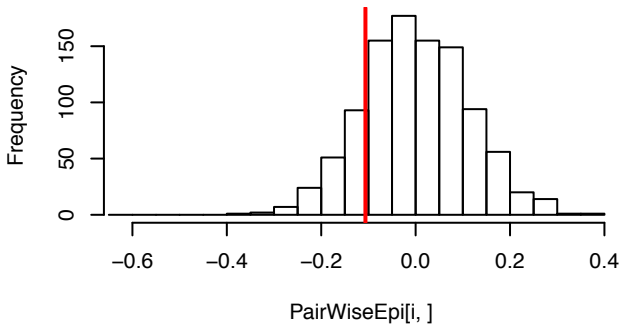**E103K & A329T**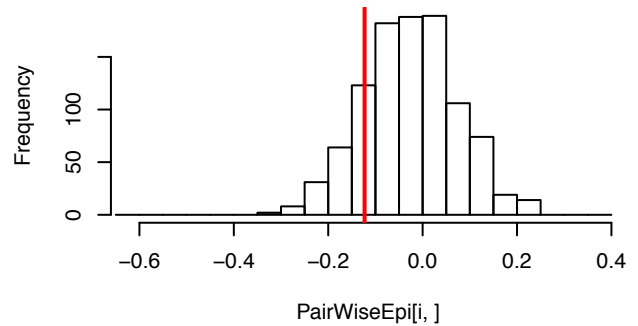**T118S & D161G**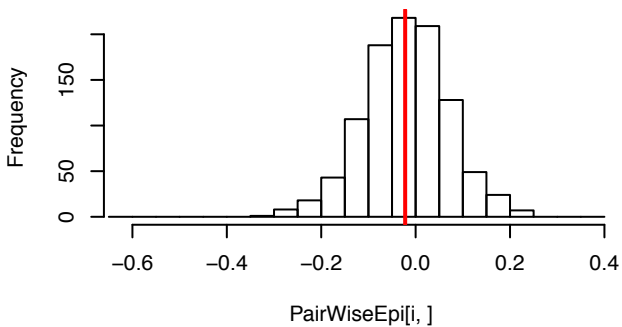**T118S & H162Q**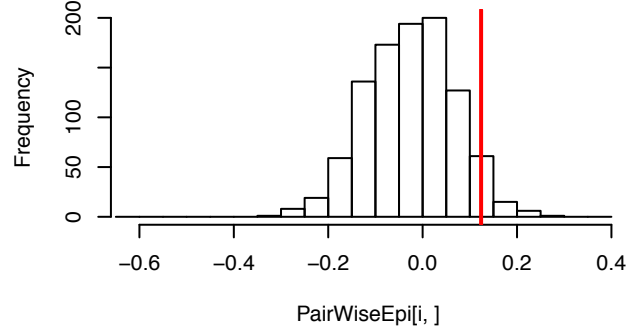

**T118S & S173R**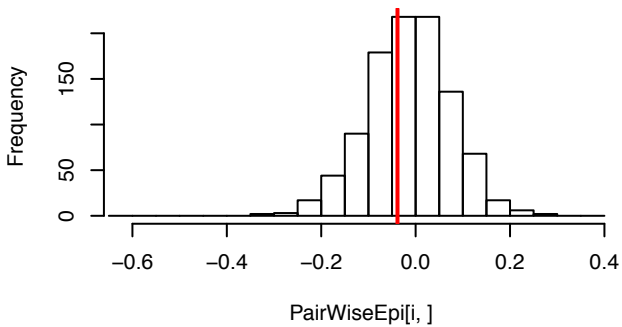**T118S & K219R**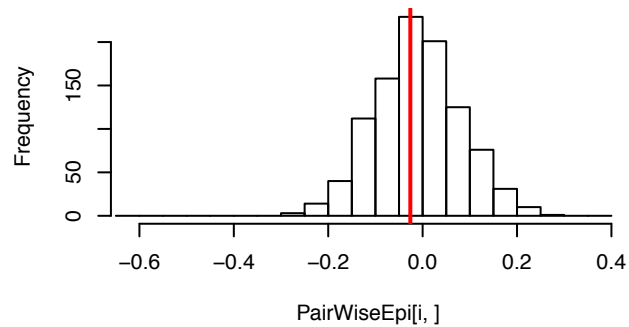**T118S & Y220N**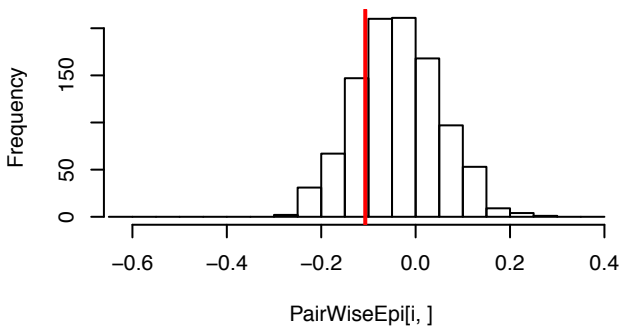**T118S & D299E**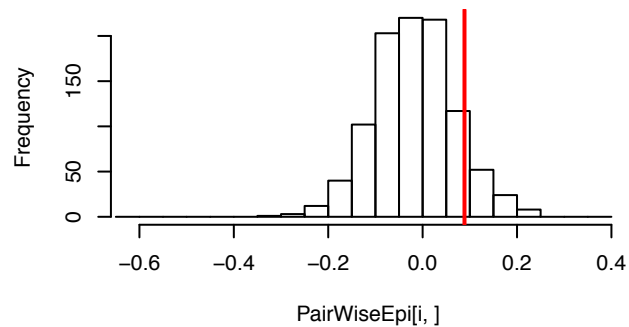**T118S & V315A**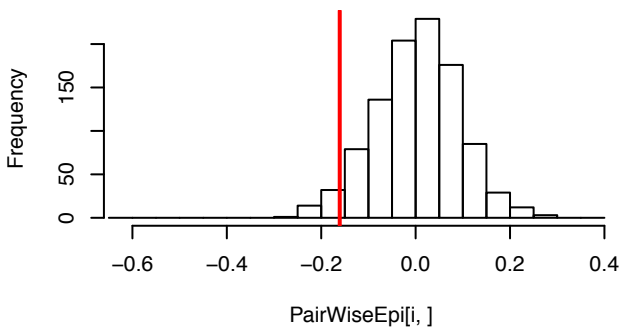**T118S & A321G**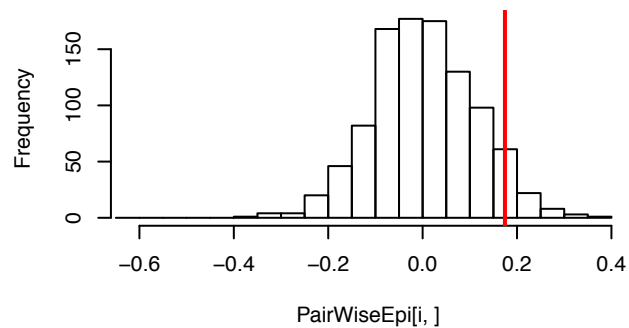

**T118S & A329T**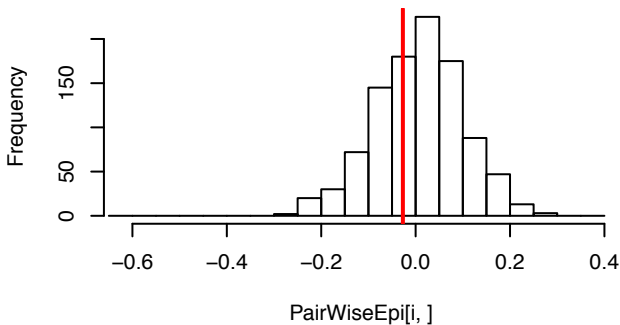**D161G & H162Q**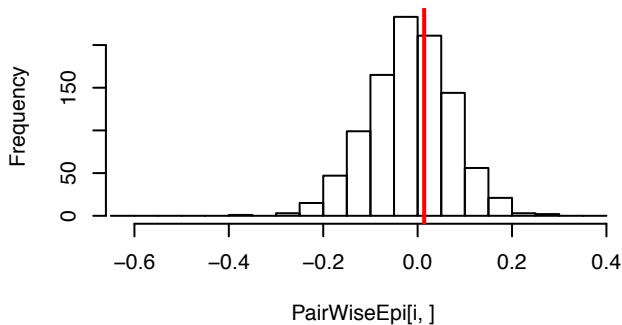**D161G & S173R**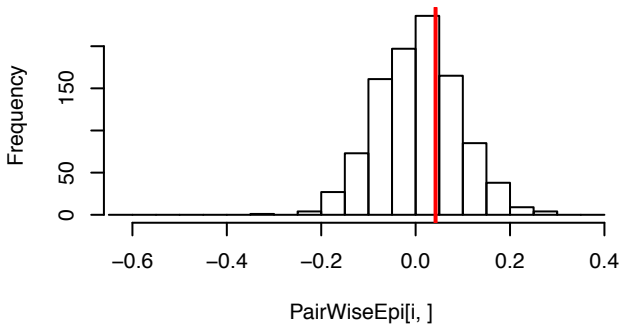**D161G & K219R**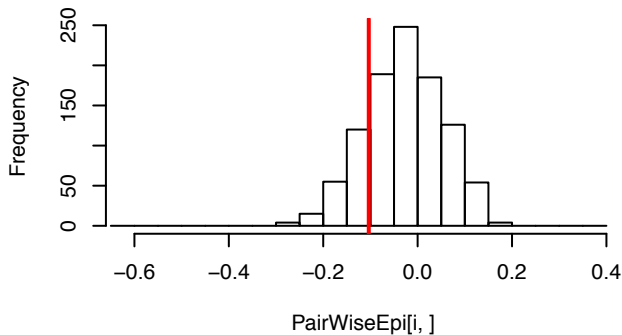**D161G & Y220N**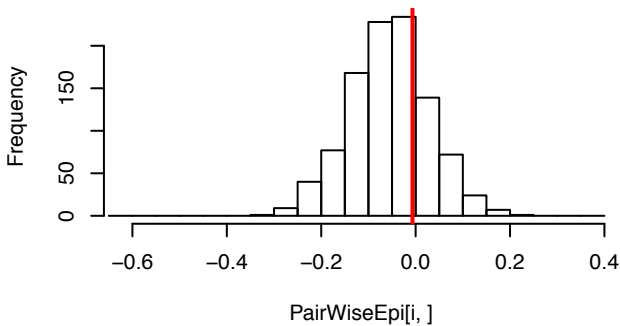**D161G & D299E**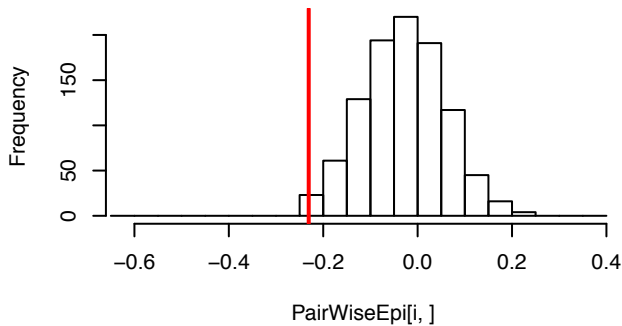

**D161G & V315A**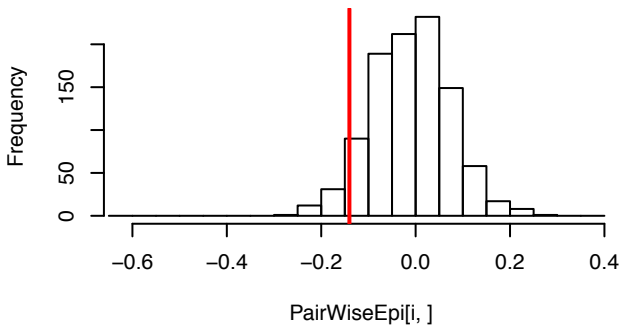**D161G & A321G**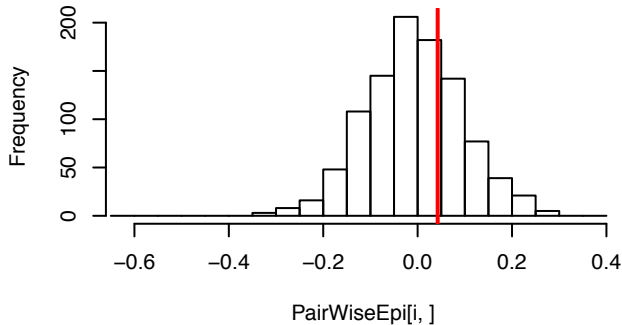**D161G & A329T**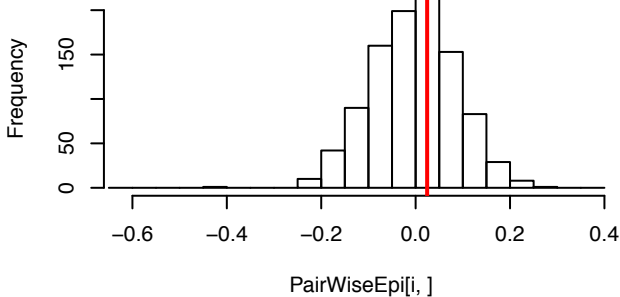**H162Q & S173R**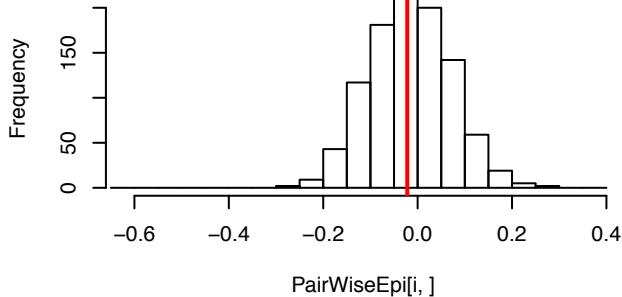**H162Q & K219R**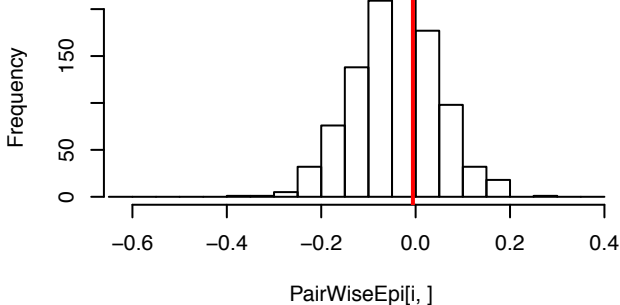**H162Q & Y220N**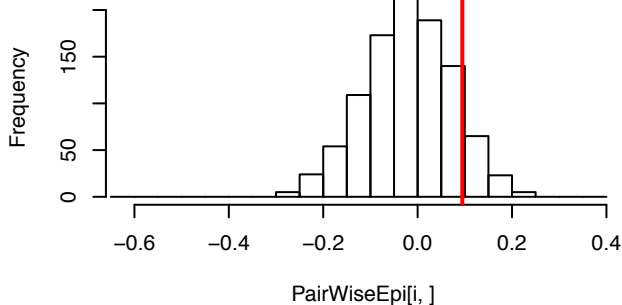

**H162Q & D299E**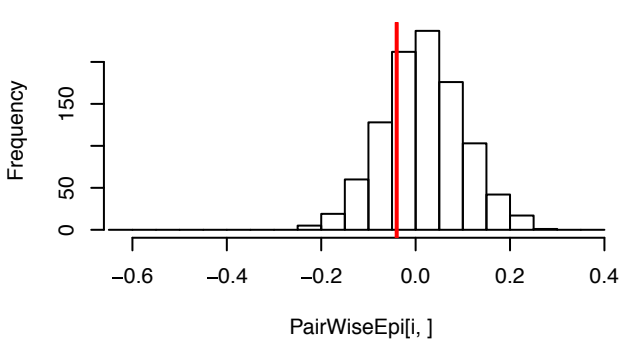**H162Q & V315A**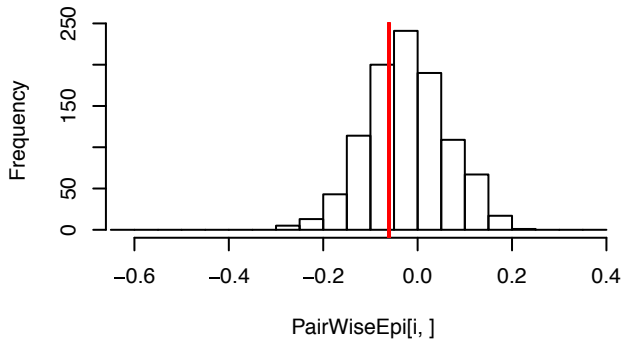**H162Q & A321G**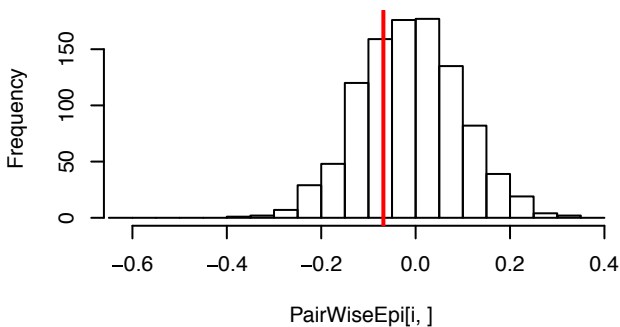**H162Q & A329T**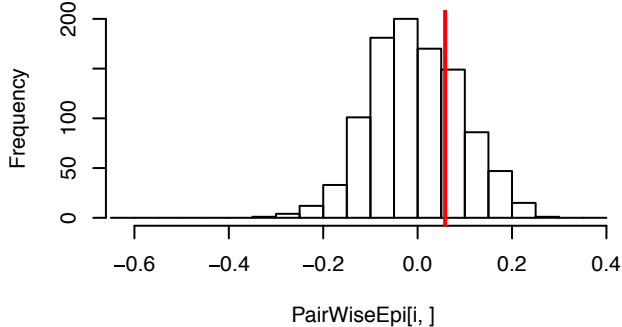**S173R & K219R**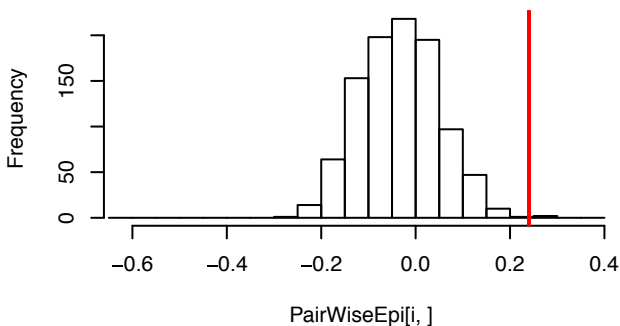**S173R & Y220N**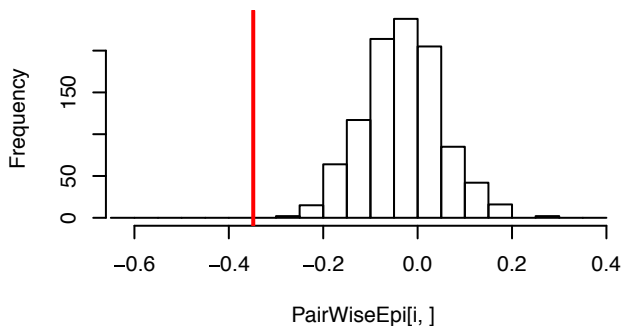

**S173R & D299E**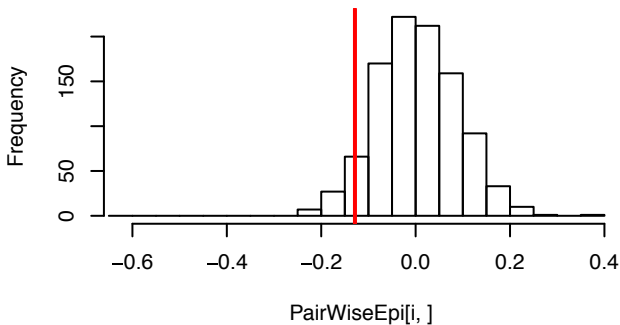**S173R & V315A**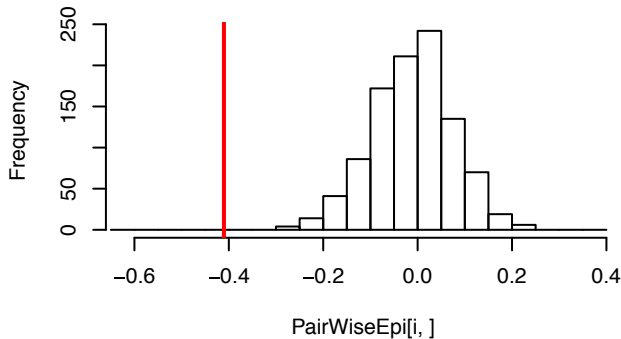**S173R & A321G**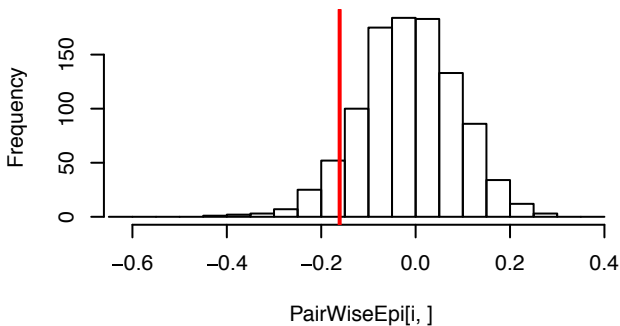**S173R & A329T**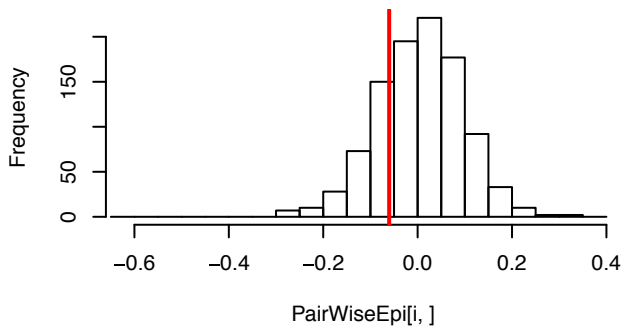**K219R & Y220N**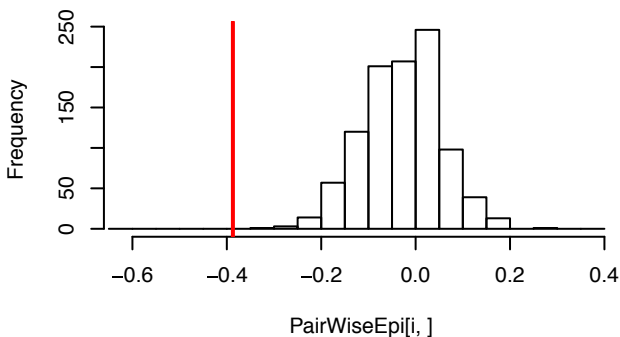**K219R & D299E**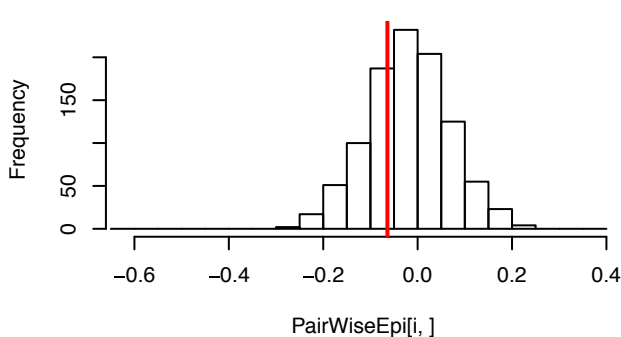

**K219R & V315A**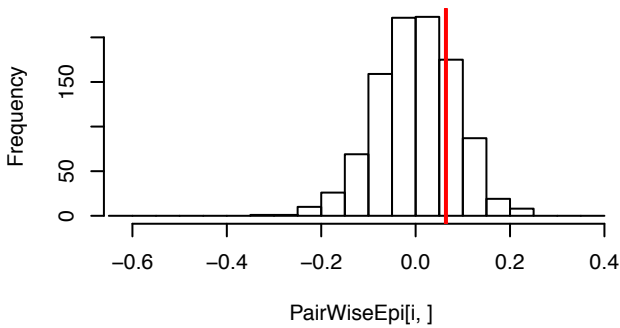**K219R & A321G**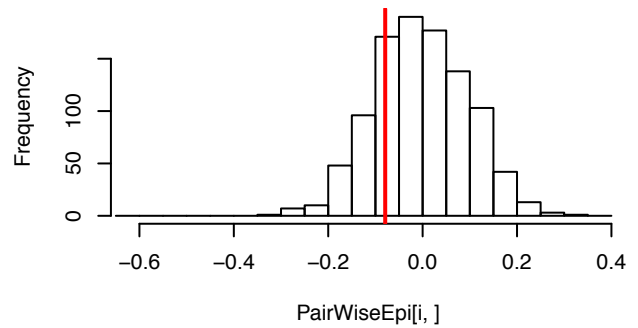**K219R & A329T**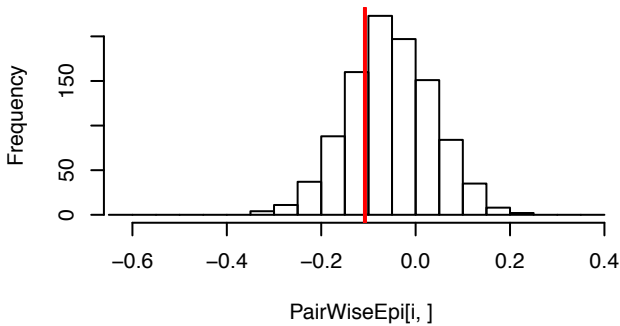**Y220N & D299E**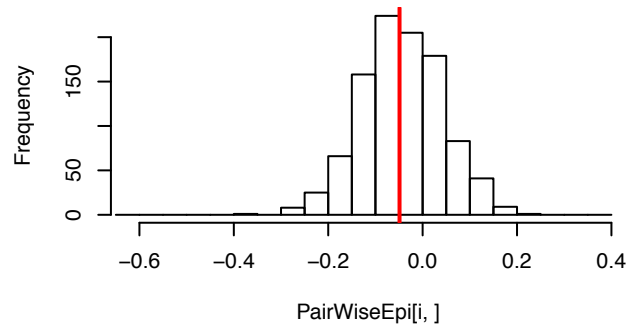**Y220N & V315A**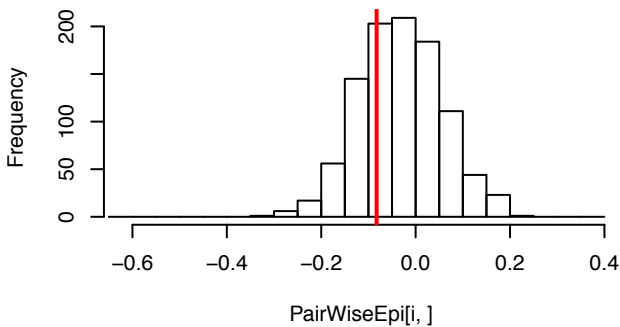**Y220N & A321G**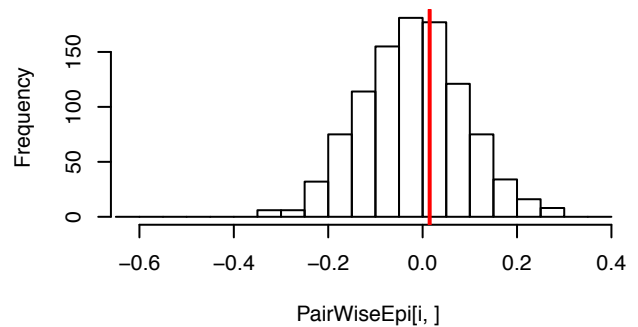



**Y220N & A329T**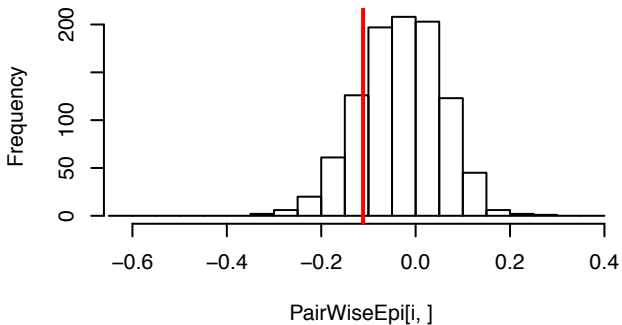**D299E & V315A**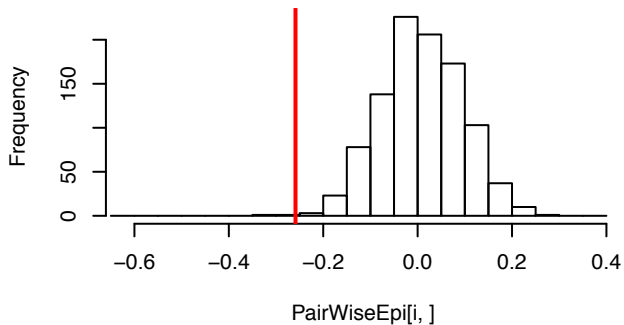**D299E & A321G**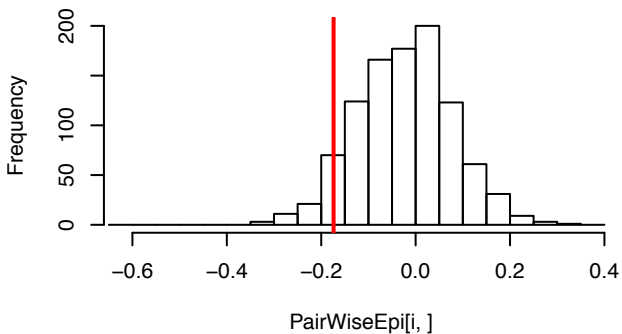**D299E & A329T**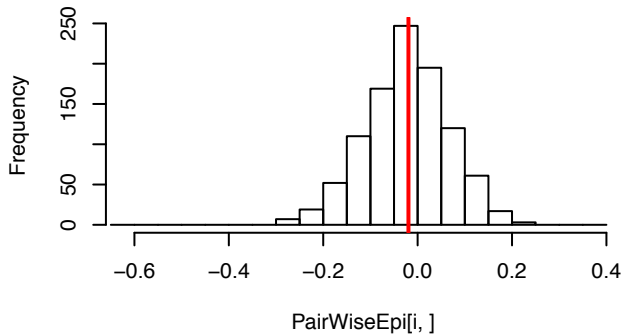**V315A & A321G**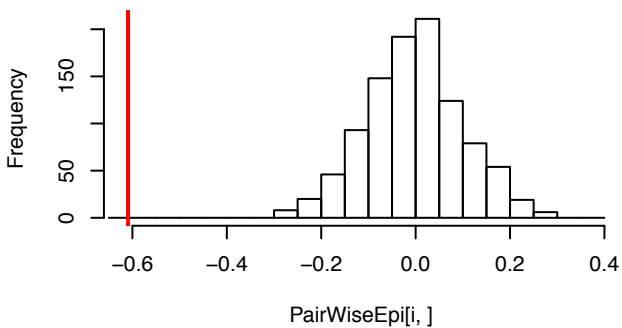**V315A & A329T**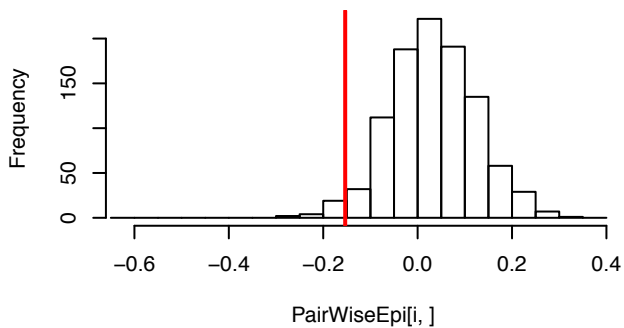

# A321G & A329T

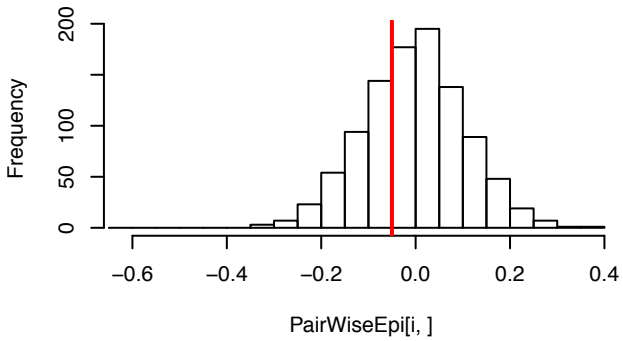

Supplement: supp6 [file elife-58061-supp6-v2.pdf]
