# Supplementary material for: Primary and promiscuous functions coexist during evolutionary innovation through whole protein domain acquisitions
Source: PubMed Central journal article supplement (PMC7790495; doi:10.7554/elife.58061), 2020-12-15

# Single Mutants

103:K ; mut ; 1019 unique seqs

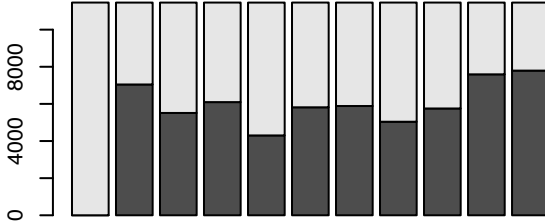

103:E ; WT ; 1018 unique seqs

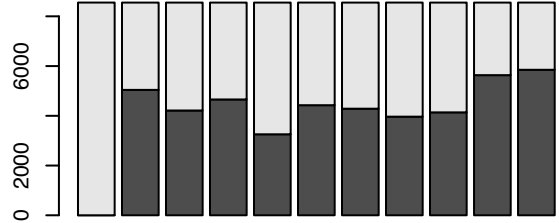

118:S ; mut ; 1024 unique seqs

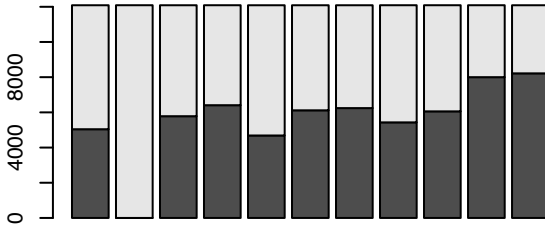

118:T ; WT ; 1013 unique seqs

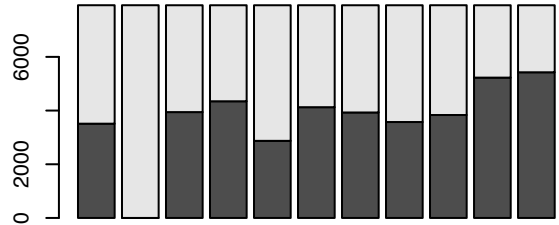

161:G ; mut ; 1017 unique seqs

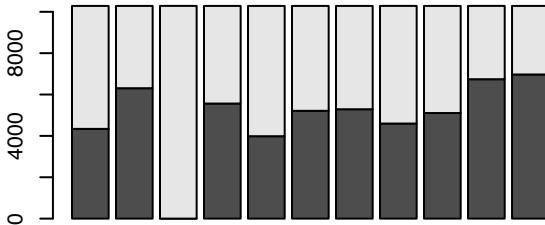

161:D ; WT ; 1020 unique seqs

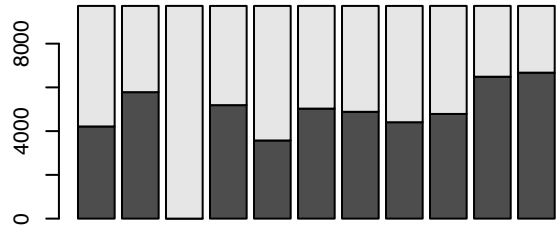

**162:Q ; mut ; 1017 unique seqs**

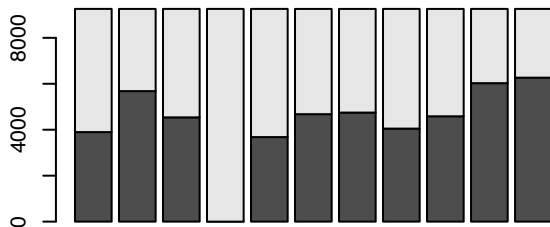

**162:H ; WT ; 1020 unique seqs**

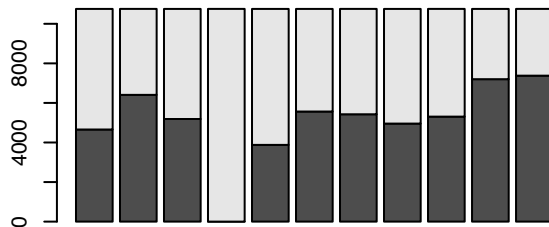

**173:R ; mut ; 1015 unique seqs**

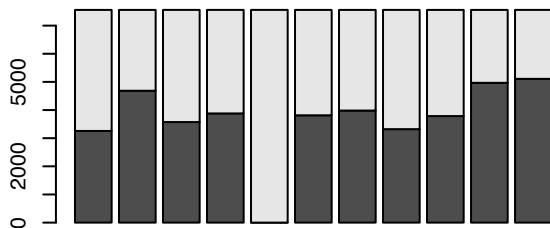

**173:S ; WT ; 1022 unique seqs**

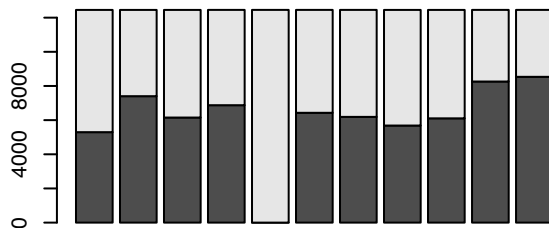

**219:R ; mut ; 1022 unique seqs**

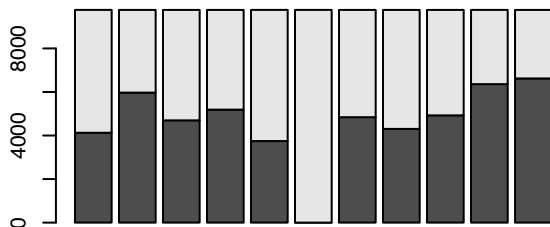

**219:K ; WT ; 1015 unique seqs**

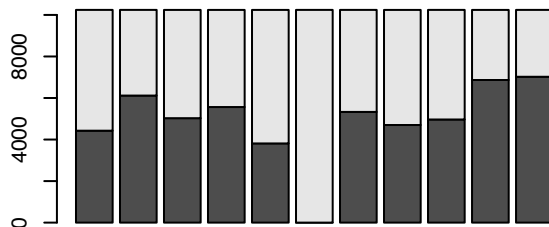

**220:N ; mut ; 1019 unique seqs**

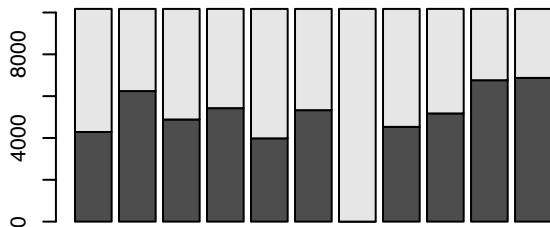

**220:Y ; WT ; 1018 unique seqs**

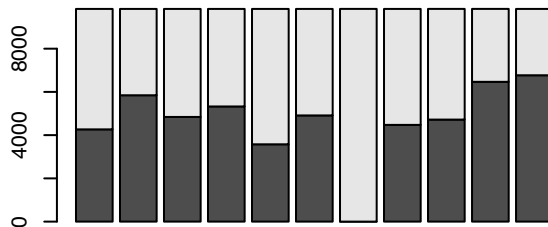

**299:E ; mut ; 1018 unique seqs**

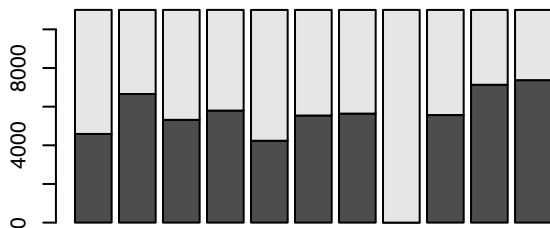

**299:D ; WT ; 1019 unique seqs**

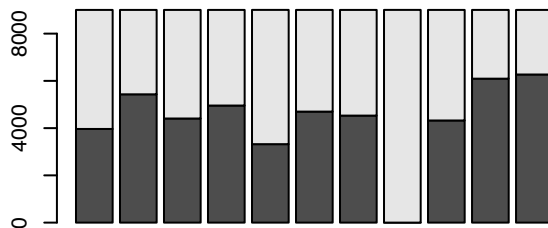

**315:A ; mut ; 1019 unique seqs**

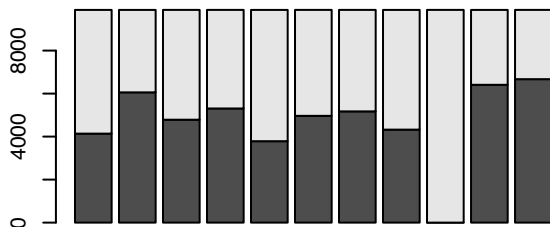

**315:V ; WT ; 1018 unique seqs**

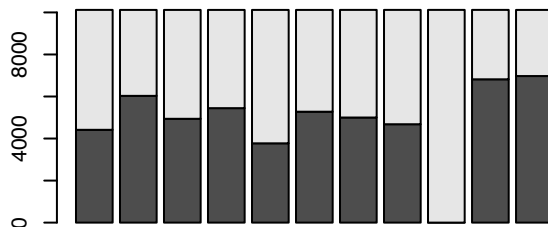

**321:G ; mut ; 1017 unique seqs**

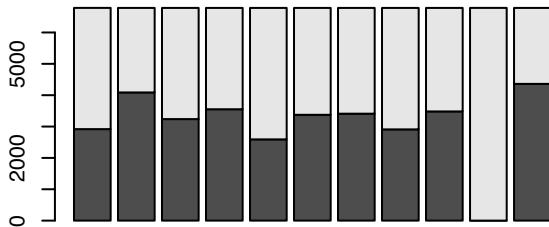

**321:A ; WT ; 1020 unique seqs**

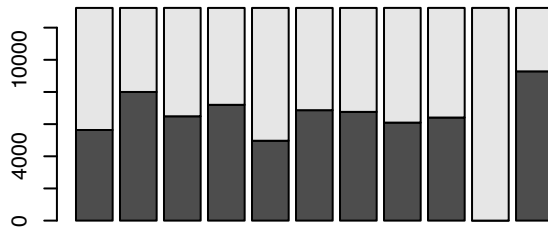

**329:T ; mut ; 1014 unique seqs**

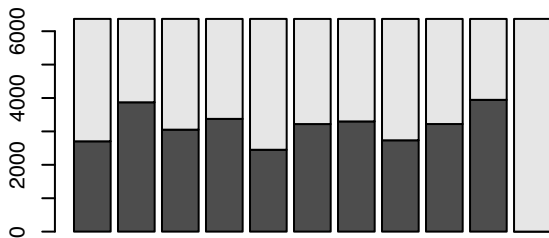

**329:A ; WT ; 1023 unique seqs**

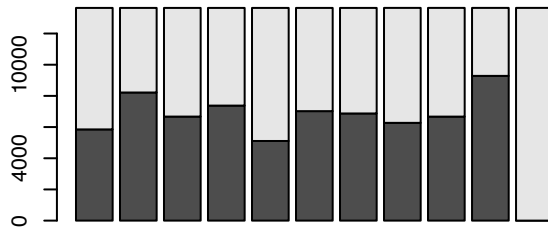

# Double Mutants

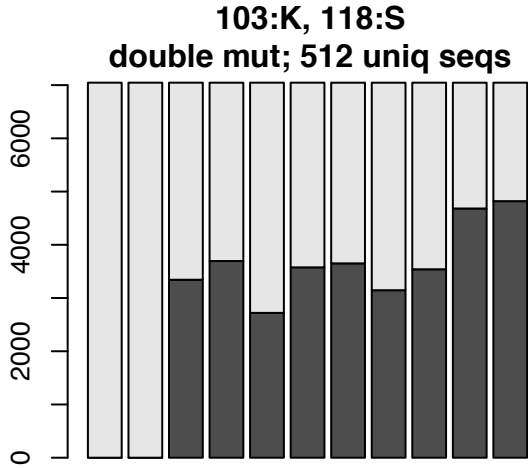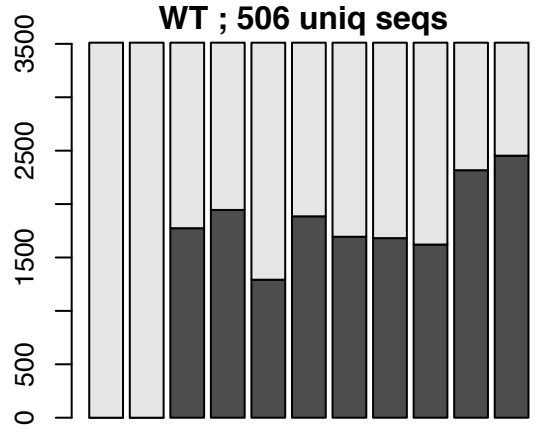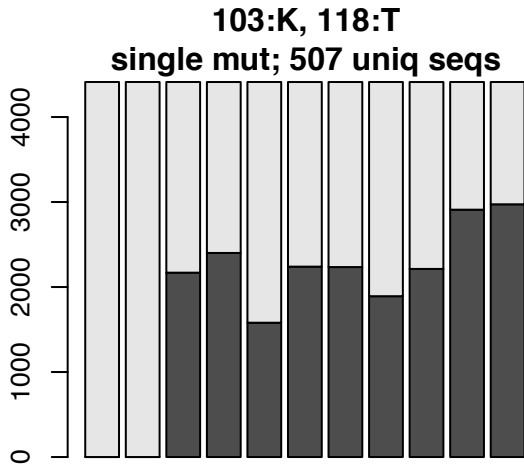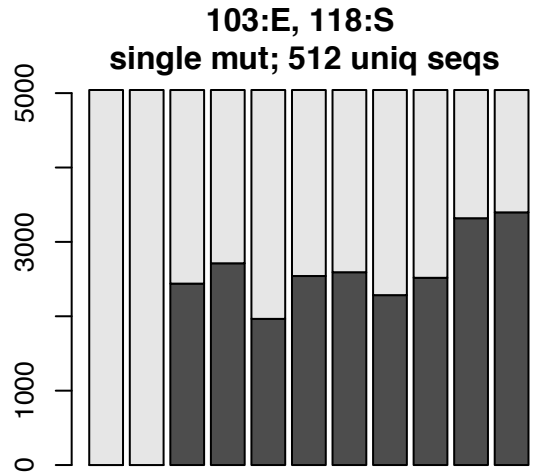

**103:K, 161:G**

**double mut; 509 unique seqs**

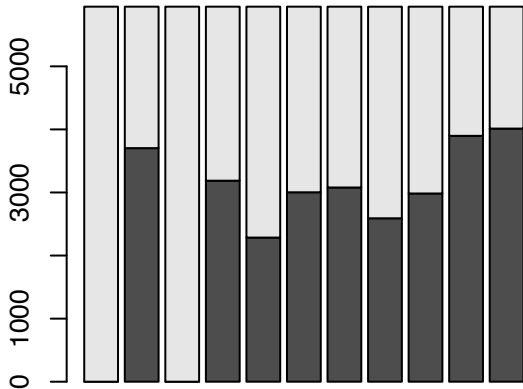

**WT ; 510 unique seqs**

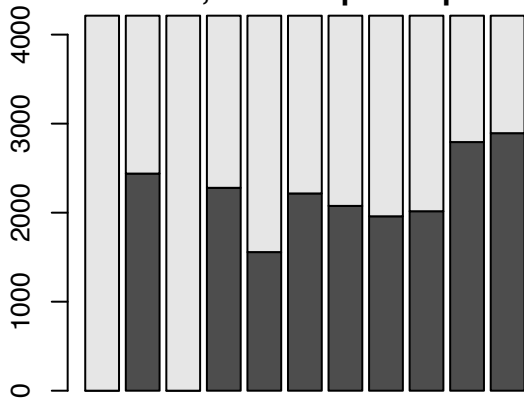

**103:K, 161:D**

**single mut; 510 unique seqs**

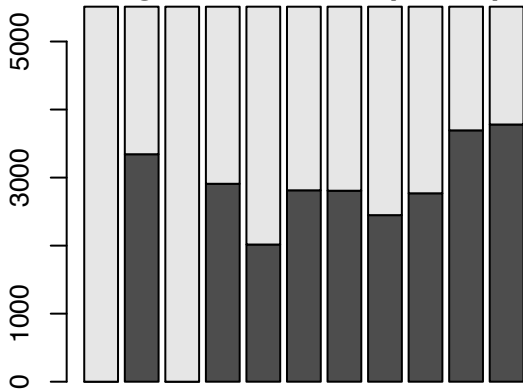

**103:E, 161:G**

**single mut; 508 unique seqs**

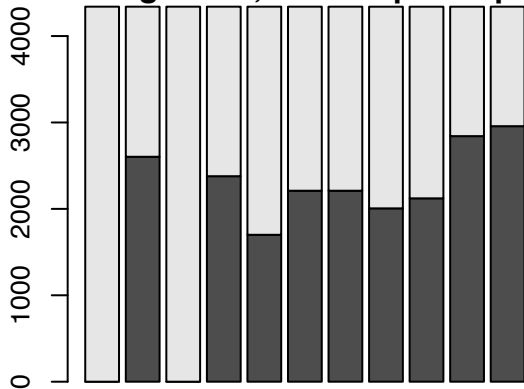

**103:K, 162:Q**

**double mut; 508 unique seqs**

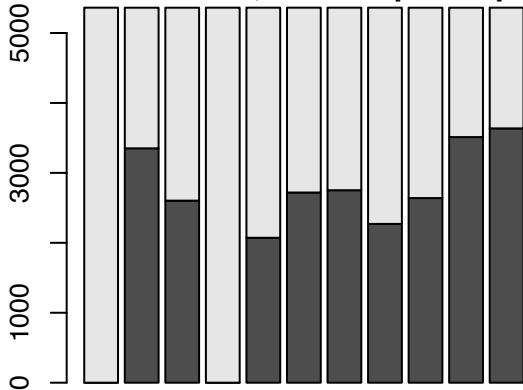

**WT ; 509 unique seqs**

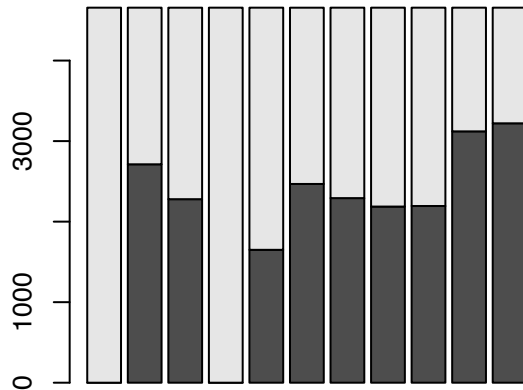

**103:K, 162:H**

**single mut; 511 unique seqs**

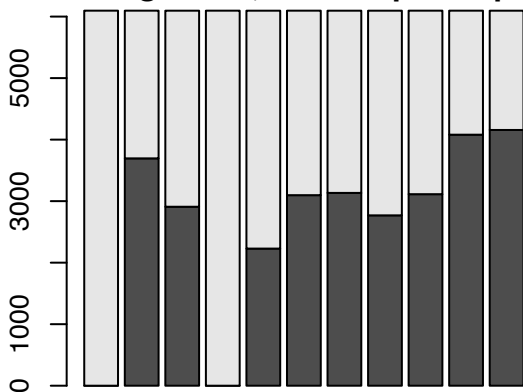

**103:E , 162:Q**

**single mut; 509 unique seqs**

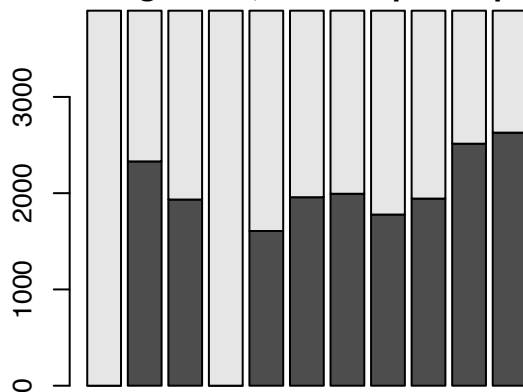

**103:K, 173:R**

**double mut; 507 unique seqs**

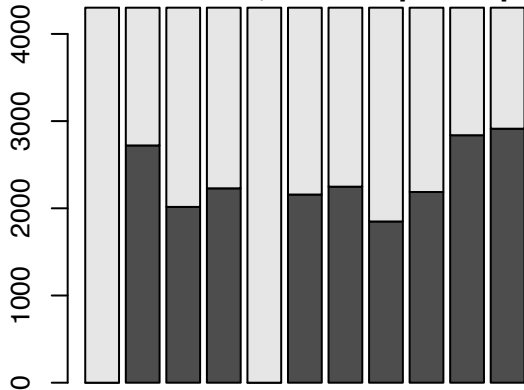

**WT; 510 unique seqs**

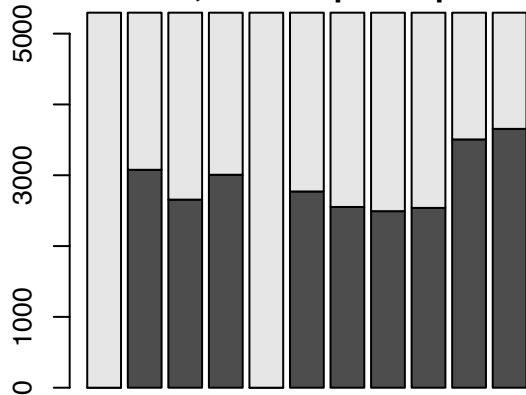

**103:K, 173:S**

**single mut; 512 unique seqs**

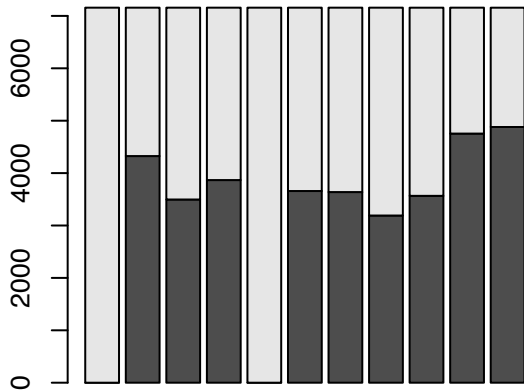

**103:E, 173R**

**single mut ; 508 unique seqs**

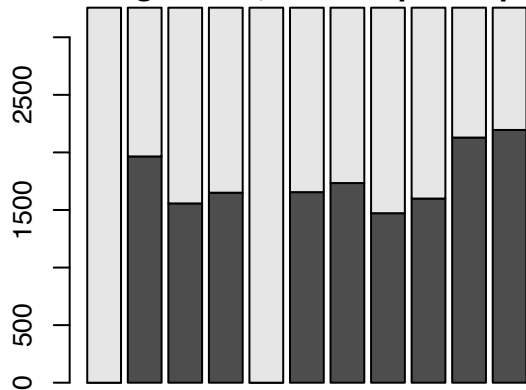



**103:K, 219:R**

**double mut; 511 unique seqs**

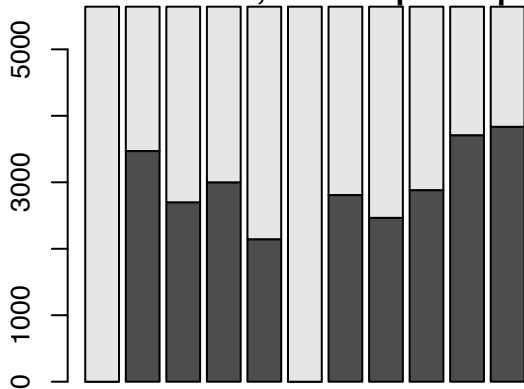

**WT; 507 unique seqs**

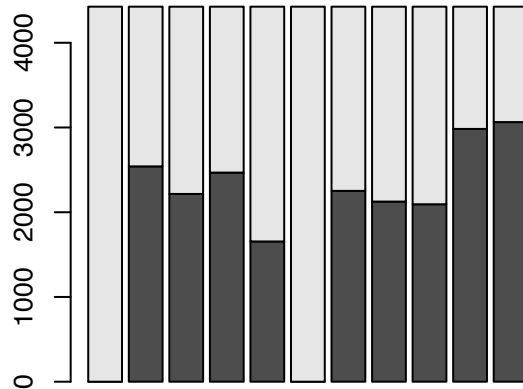

**103:K, 219:K**

**single mut; 508 unique seqs**

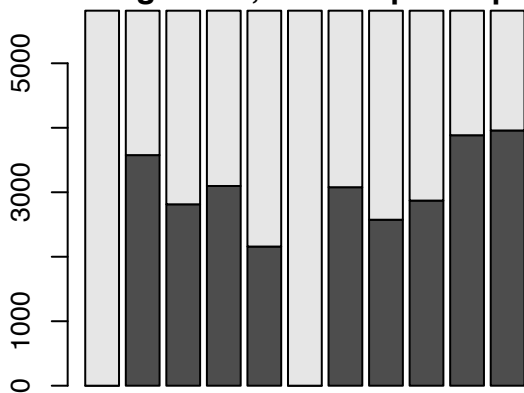

**103:E, 219:R**

**single mut; 511 unique seqs**

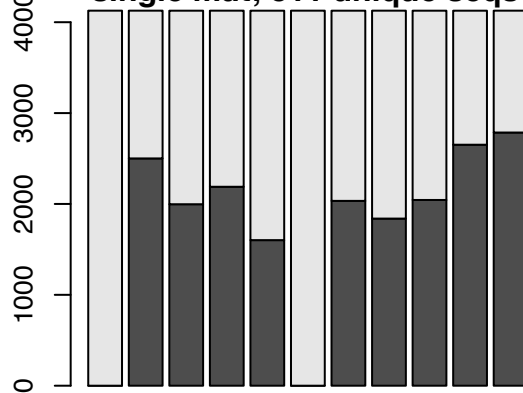

**103:K, 220:N**

**double mut; 510 unique seqs**

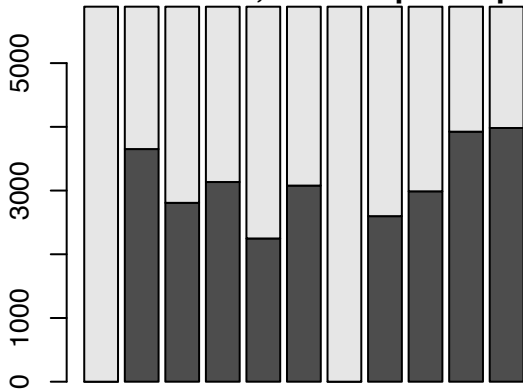

**WT; 509 unique seqs**

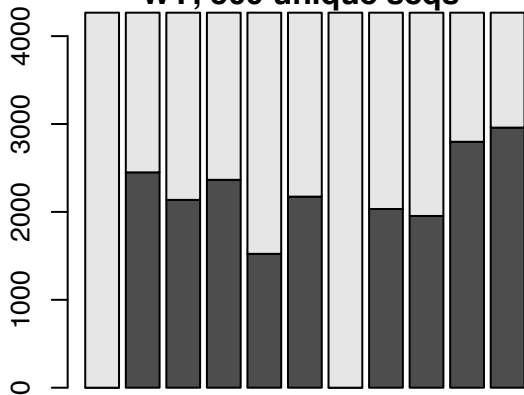

**103:K, 220:Y**

**single mut; 509 unique seqs**

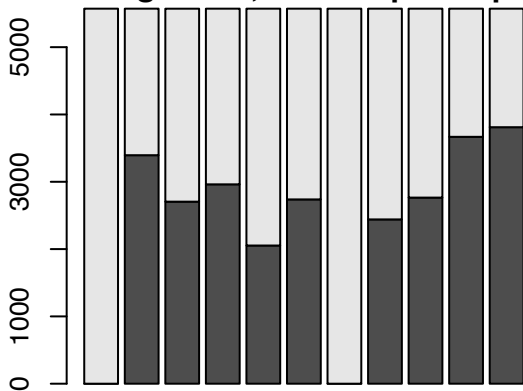

**103:E, 220:N**

**single mut; 509 unique seqs**

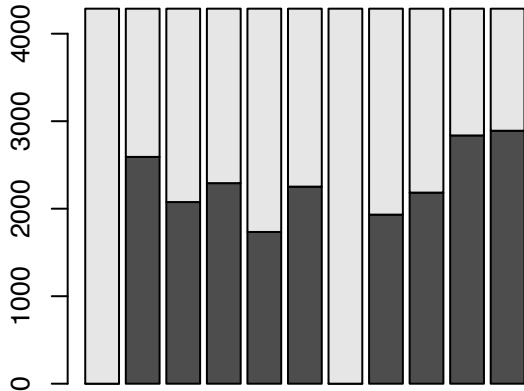

**103:K, 299:E**

**double mut; 509 unique seqs**

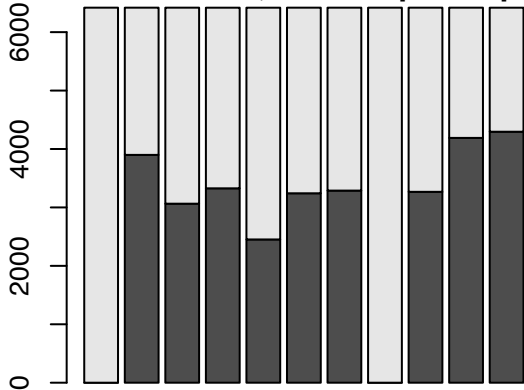

**WT; 509 unique seqs**

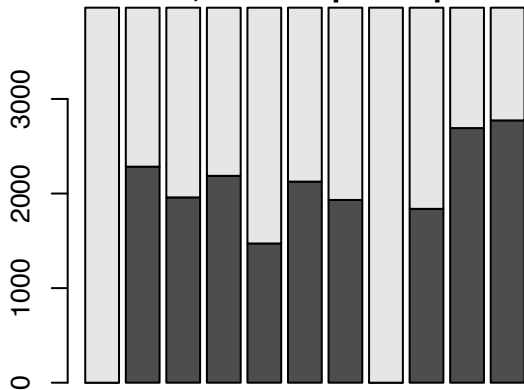

**103:K, 299:D**

**single mut; 510 unique seqs**

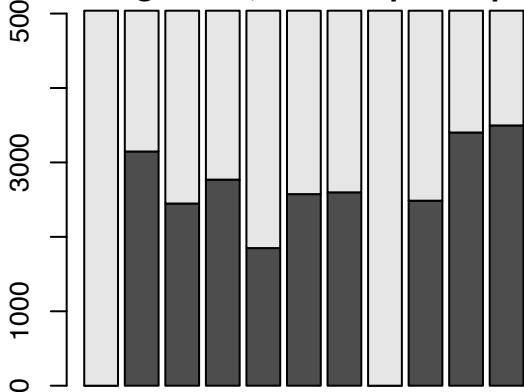

**103:E, 299:E**

**single mut ; 509 unique seqs**

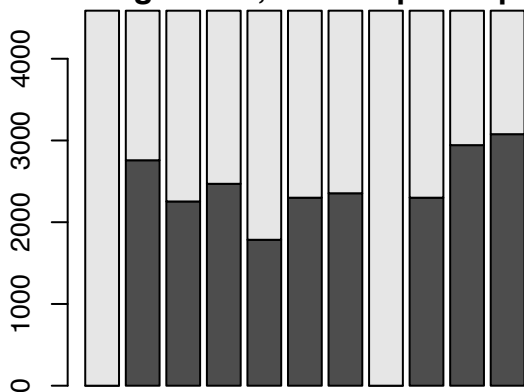

**103:K, 315:A**

**double mut; 511 unique seqs**

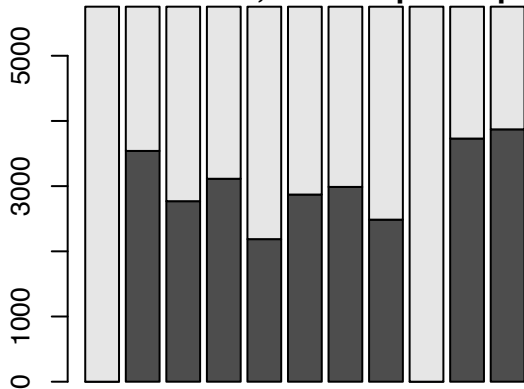

**WT; 510 unique seqs**

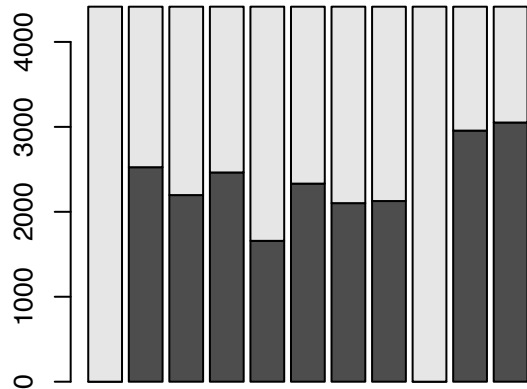

**103:K, 315:V**

**single mut; 508 unique seqs**

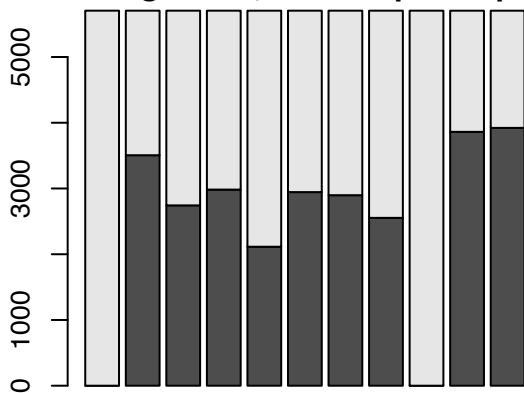

**103:E, 315:A**

**single mut; 508 unique seqs**

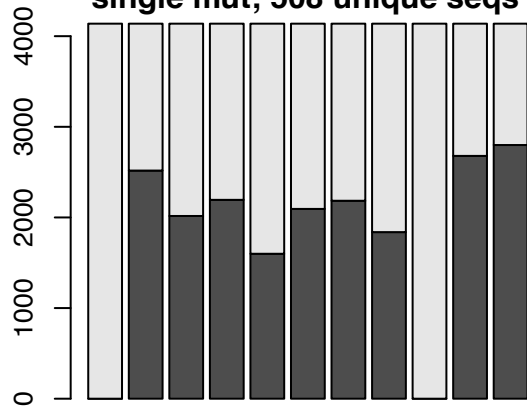

**103:K, 321:G**  
**double mut; 509 unique seqs**

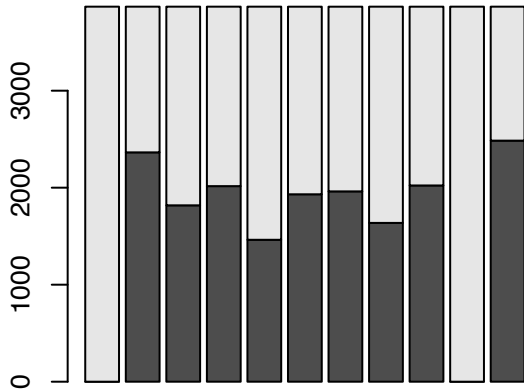

**WT; 510 unique seqs**

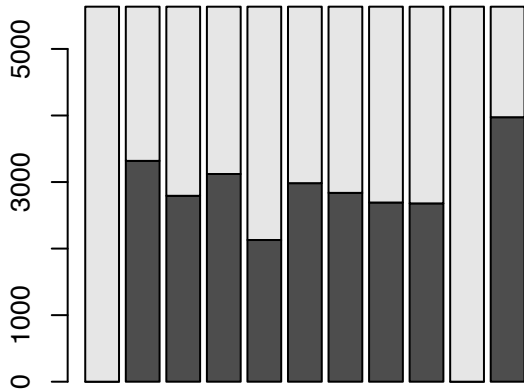

**103:K, 321:A**  
**single mut; 510 unique seqs**

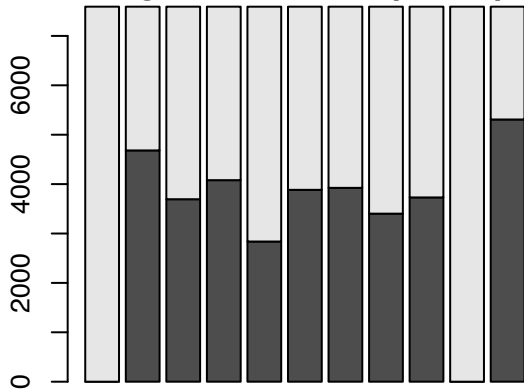

**103:E, 321:G**  
**single mut; 508 unique seqs**

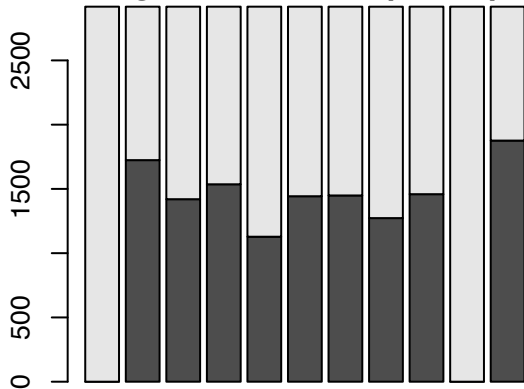

**103:K, 329:T**

**double mut; 507 unique seqs**

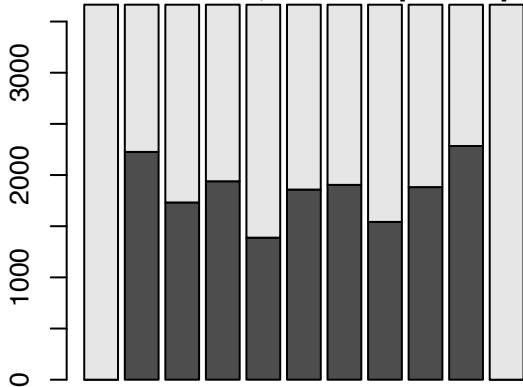

**WT ; 511 unique seqs**

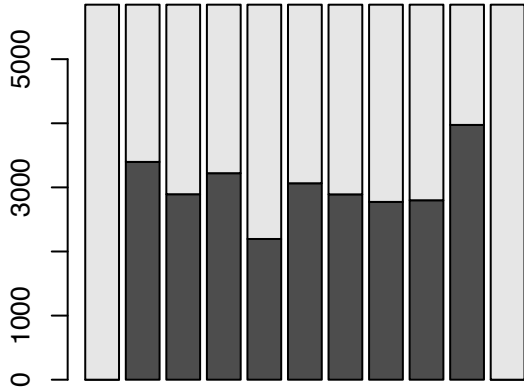

**103:K, 329:A**

**single mut; 512 unique seqs**

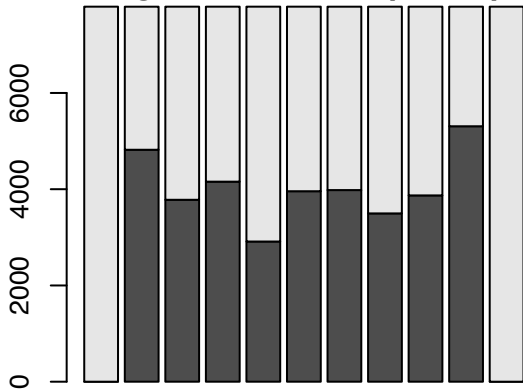

**103:E, 329:T**

**single mut; 507 unique seqs**

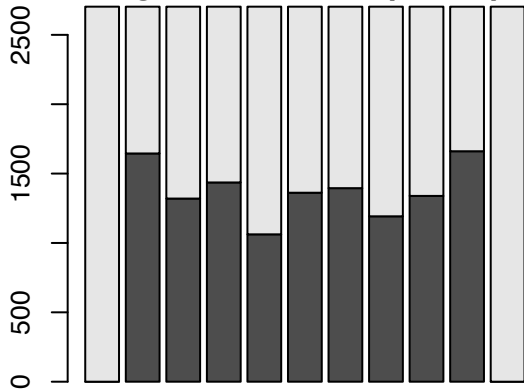

**118:S, 161:G**

**double mut; 512 unique seqs**

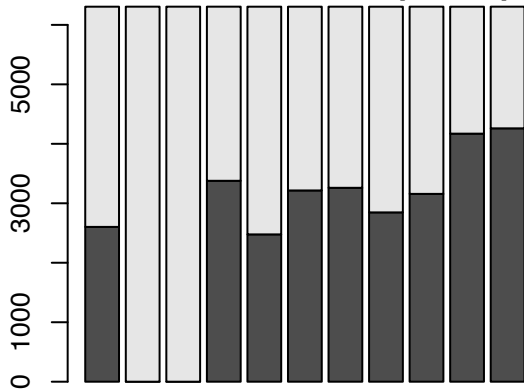

**WT; 508 unique seqs**

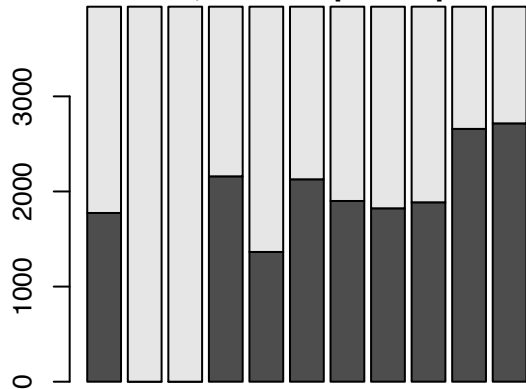

**118:S, 161:D**

**single mut; 512 unique seqs**

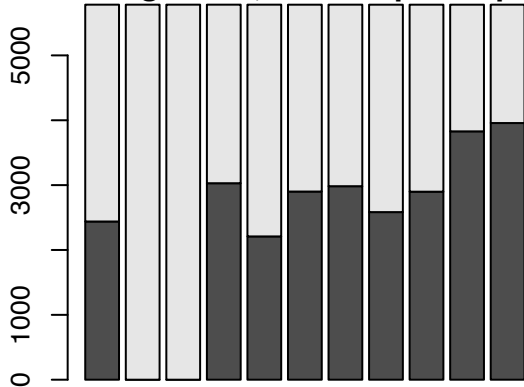

**118:T, 161:G**

**single mut; 505 unique seqs**

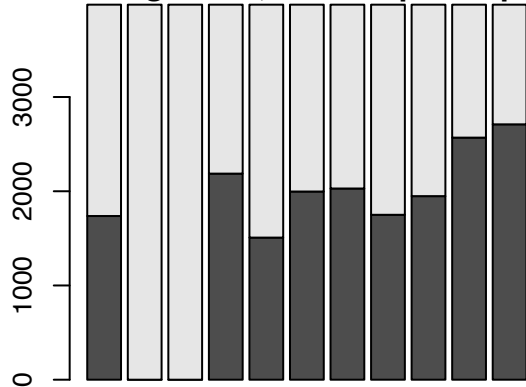

**118:S, 162:Q**

**double mut; 512 unique seqs**

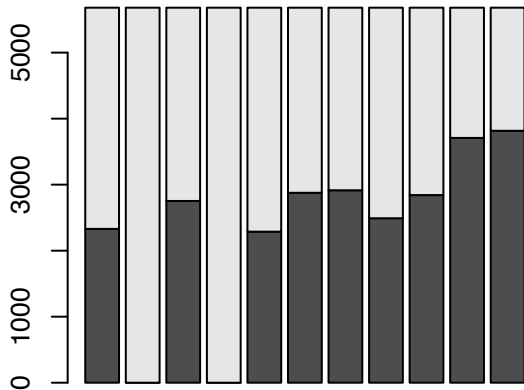

**WT; 508 unique seqs**

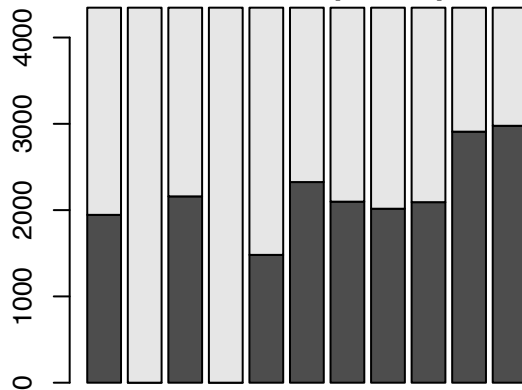

**118:S, 162:H**

**single mut; 512 unique seqs**

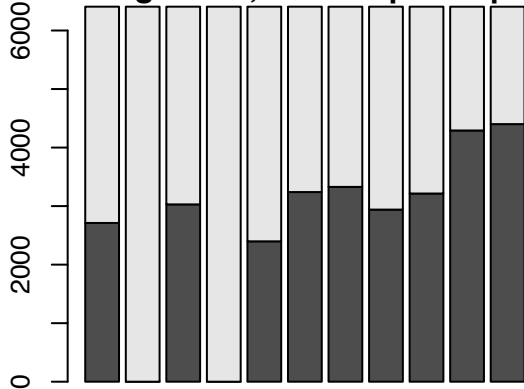

**118:T, 162:Q**

**single mut; 505 unique seqs**

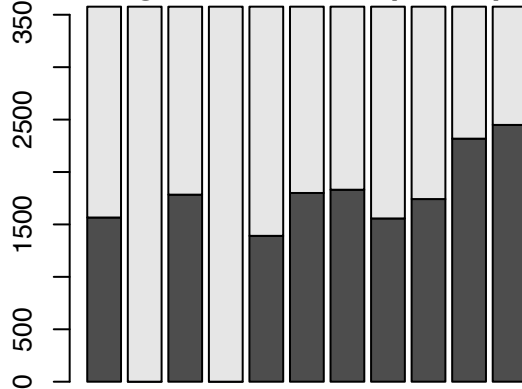



**118:S, 173:R**

**double mut; 512 unique seqs**

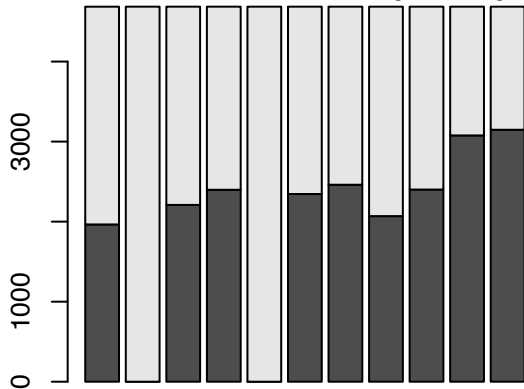

**WT; 510 unique seqs**

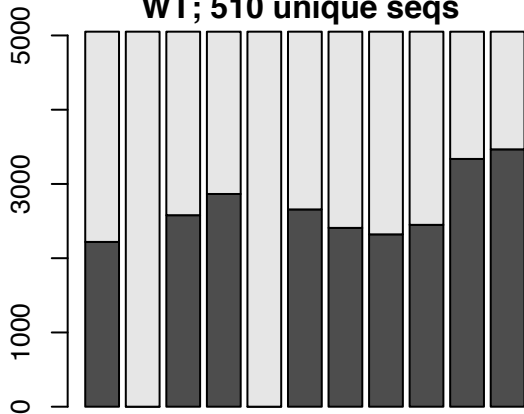

**118:S, 173:S**

**single mut; 512 unique seqs**

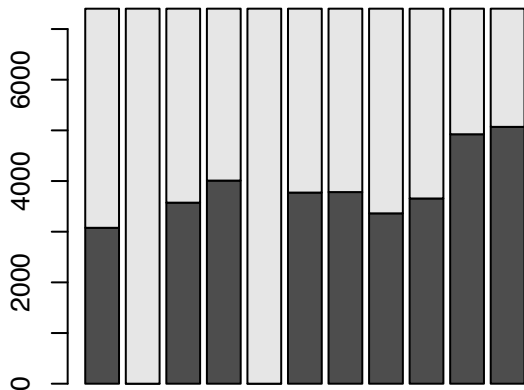

**118:T, 173:R,**

**single mut; 503 unique seqs**

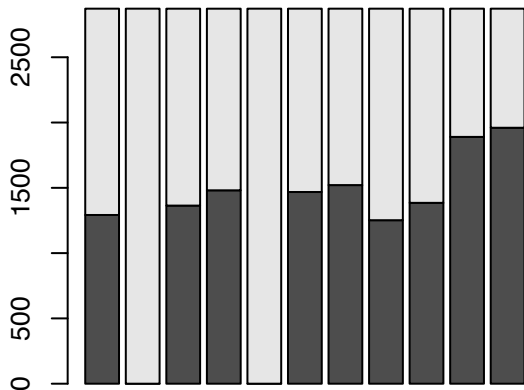

**118:S, 219:R**

**double mut; 512 unique seqs**

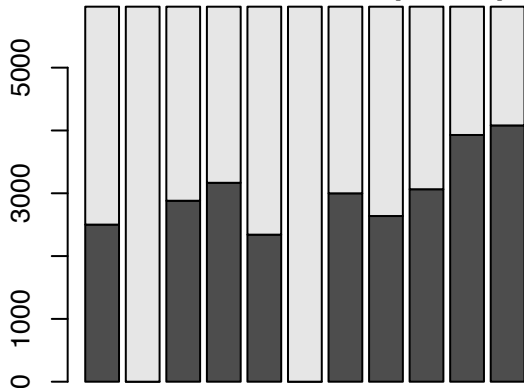

**WT 503 unique seqs**

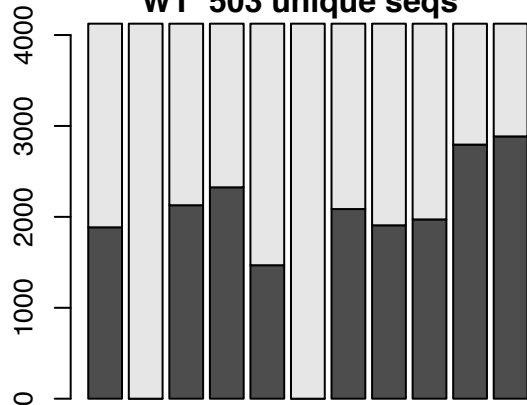

**118:S, 219:K**

**single mut; 512 unique seqs**

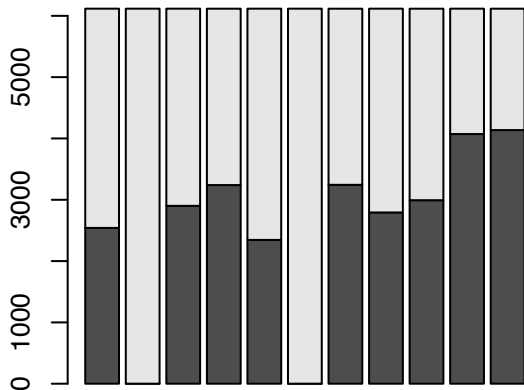

**118:T, 219:R**

**single mut; 510 unique seqs**

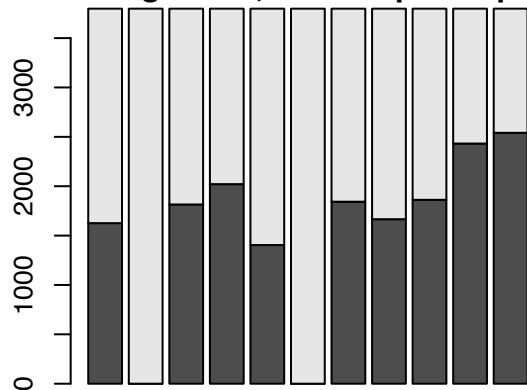

**118:S, 220:N**  
**double mut; 512 unique seqs**

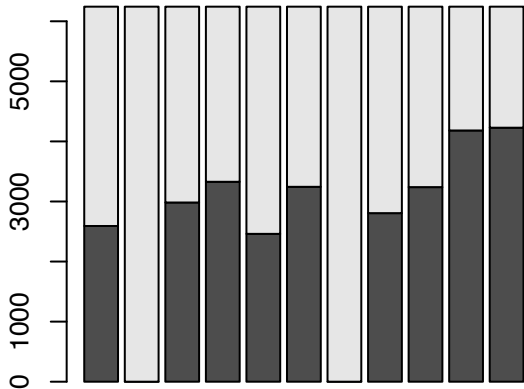

**WT; 506 unique seqs**

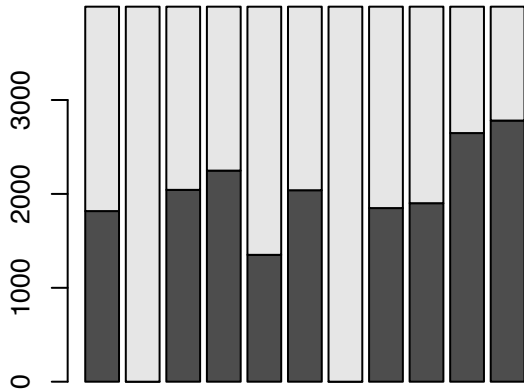

**118:S, 220:Y**  
**single mut; 512 unique seqs**

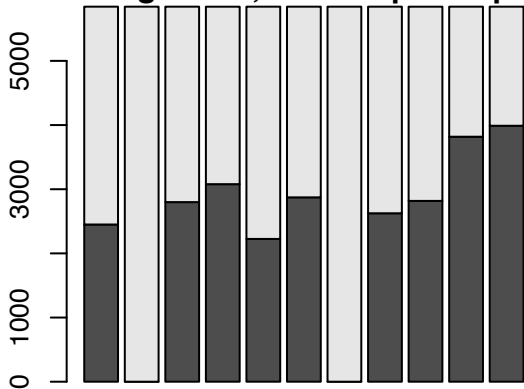

**118:T, 220:N**  
**single mut; 507 unique seqs**

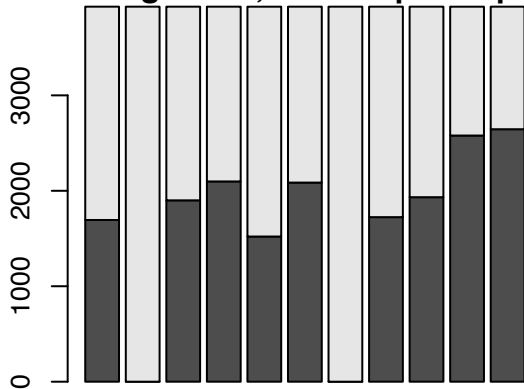

**118:S, 299:E**  
**double mut; 512 unique seqs**

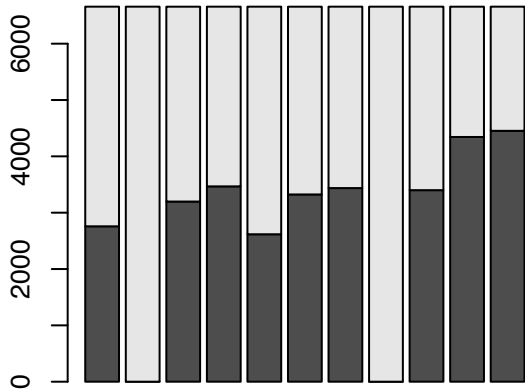

**WT; 507 unique seqs**

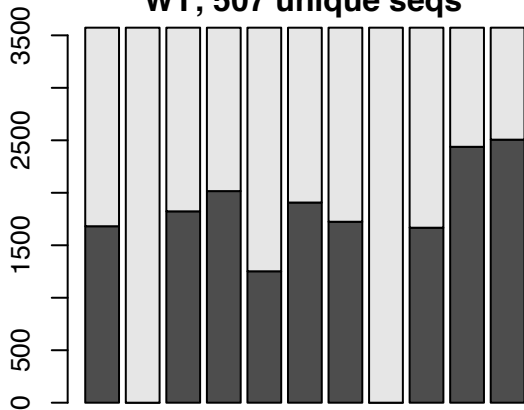

**118:S, 299:D**  
**single mut; 512 unique seqs**

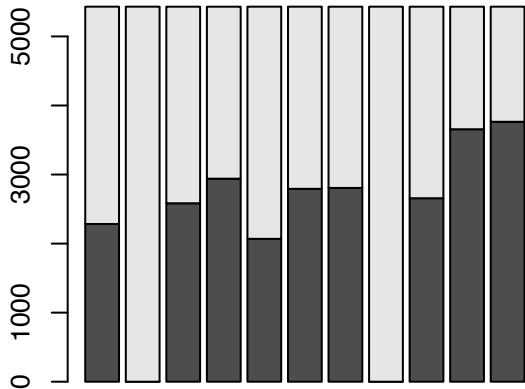

**118:T, 299:E**  
**single mut; 506 unique seqs**

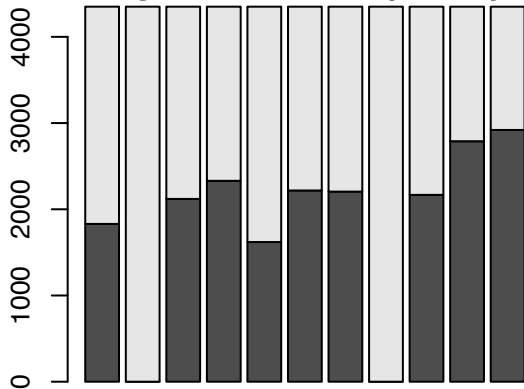

**118:S, 315:A**

**double mut; 512 unique seqs**

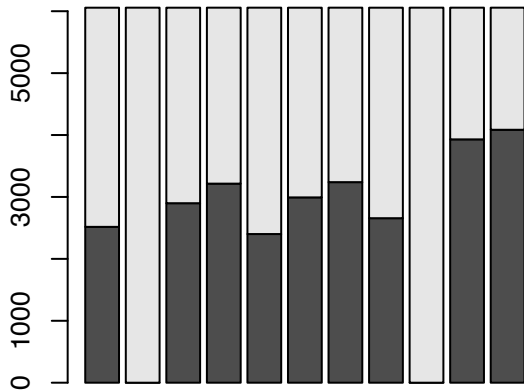

**WT; 506 unique seqs**

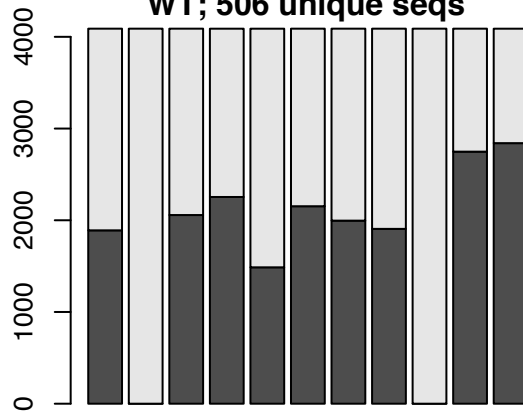

**118:S, 315:V**

**single mut; 512 unique seqs**

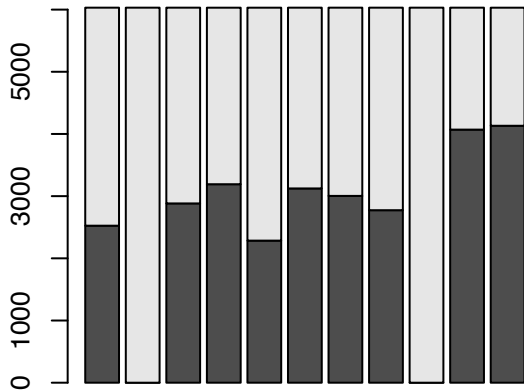

**118:T, 315:A**

**single mut ; 507 unique seqs**

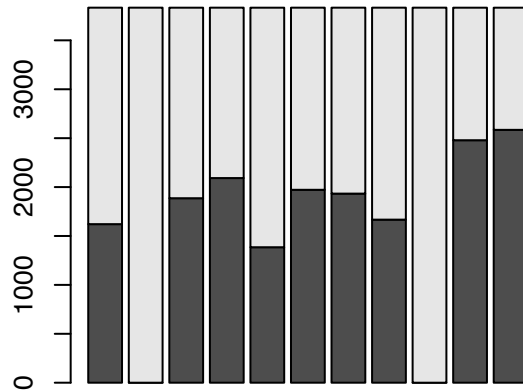

**118:S, 321:G**

**double mut; 512 unique seqs**

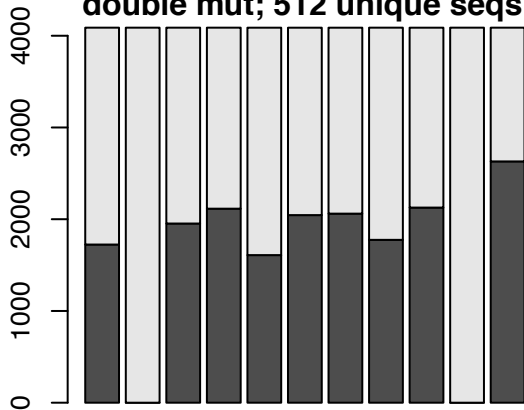

**WT; 508 unique seqs**

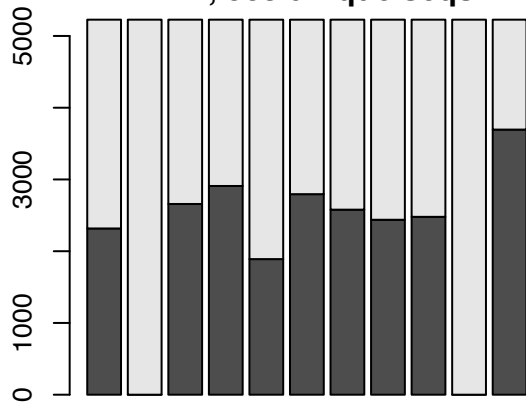

**118:S, 321:A**

**single mut; 512 unique seqs**

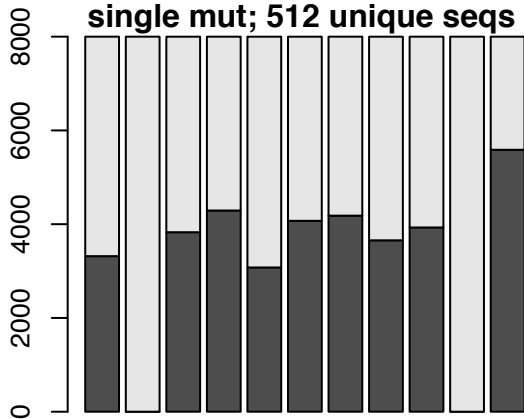

**118:T, 321:G**

**single mut; 505 unique seqs**

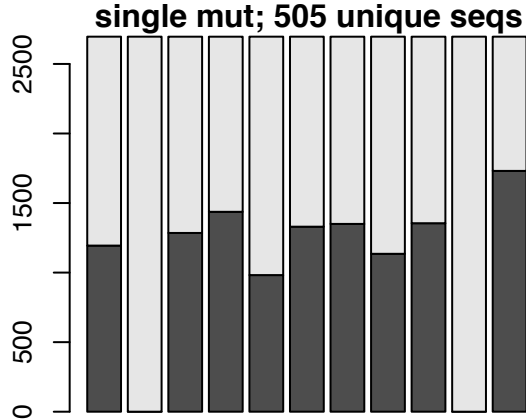

**118:S, 329:T**

**double mut; 512 unique seqs**

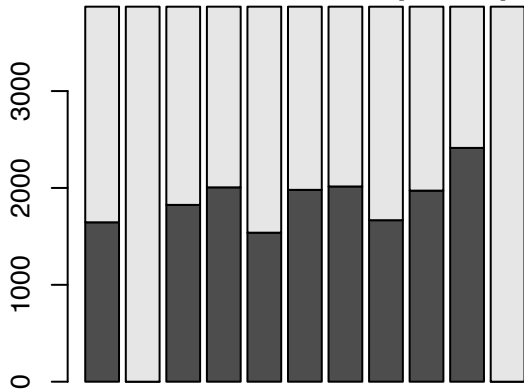

**WT; 511 unique seqs**

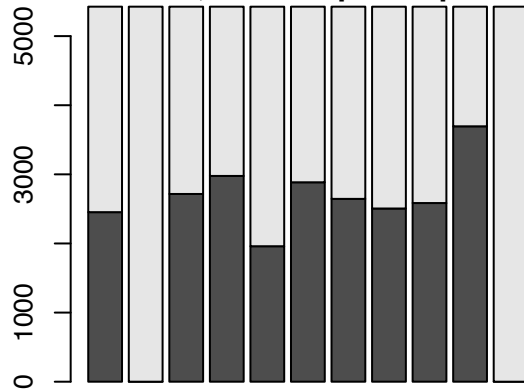

**118:S, 329:A**

**single mut; 512 unique seqs**

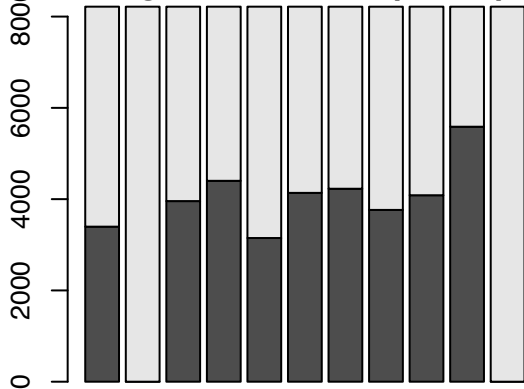

**118:T, 329:T**

**single mut; 502 unique seqs**

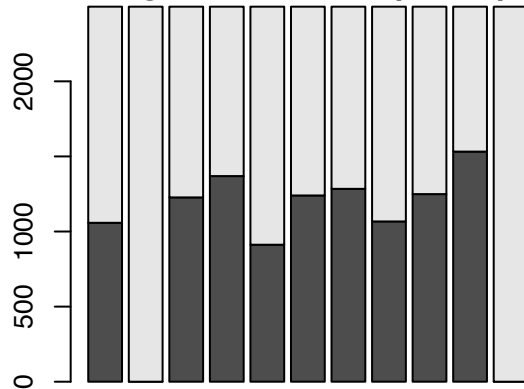

**161:G, 162:Q**  
**double mut; 507 unique seqs**

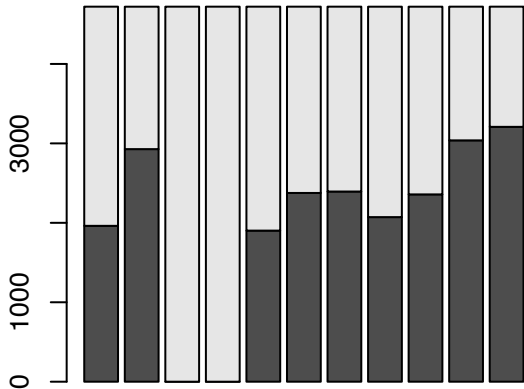

**WT; 510 unique seqs**

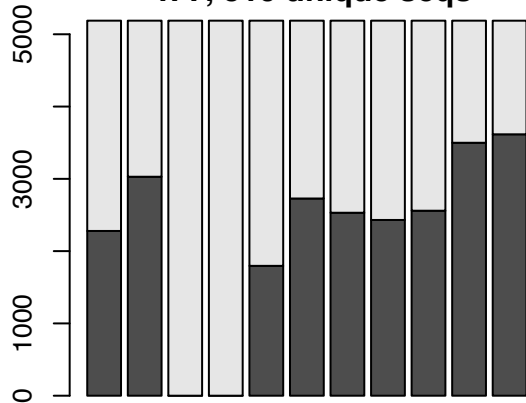

**161:G, 162:H**  
**single mut; 510 unique seqs**

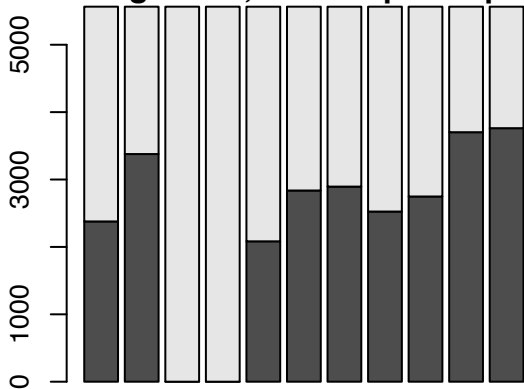

**161:D, 162:Q**  
**single mut; 510 unique seqs**

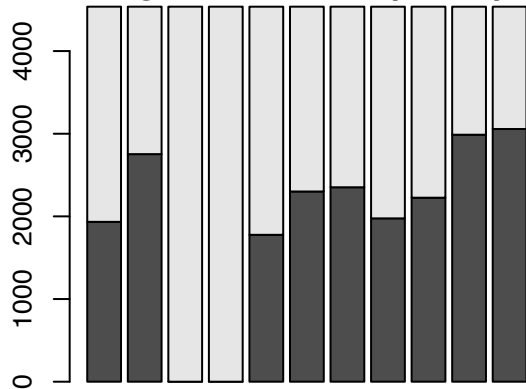



**161:G, 173:R**

**double mut; 506 unique seqs**

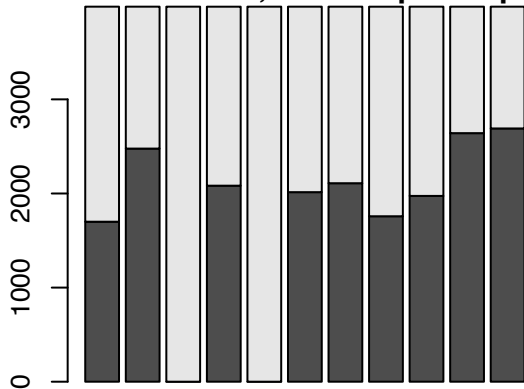

**WT; 511 unique seqs**

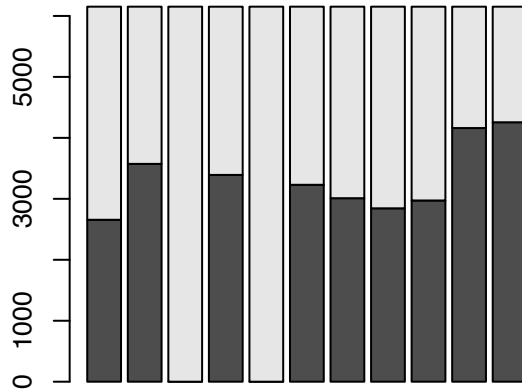

**161:G, 173:S**

**single mut; 511 unique seqs**

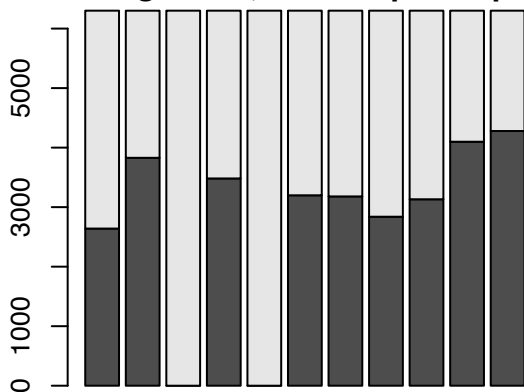

**161:D, 173:R**

**single mut; 509 unique seqs**

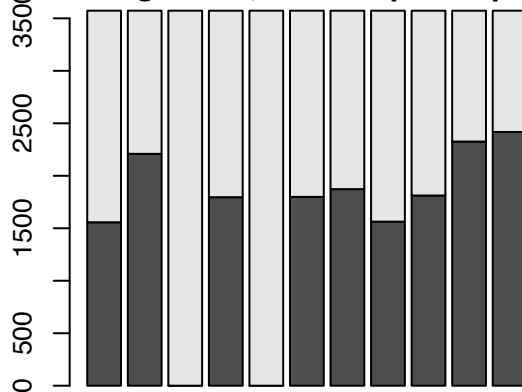

**161:G, 219:R**

**double mut; 512 unique seqs**

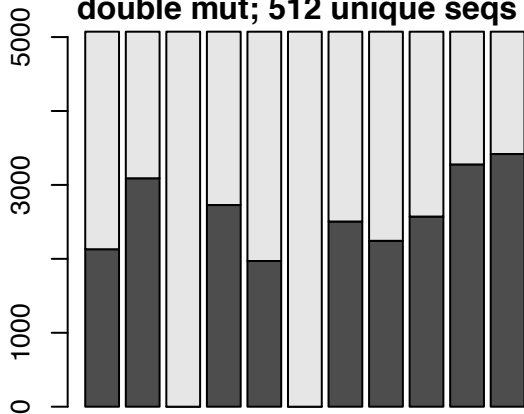

**WT; 510 unique seqs**

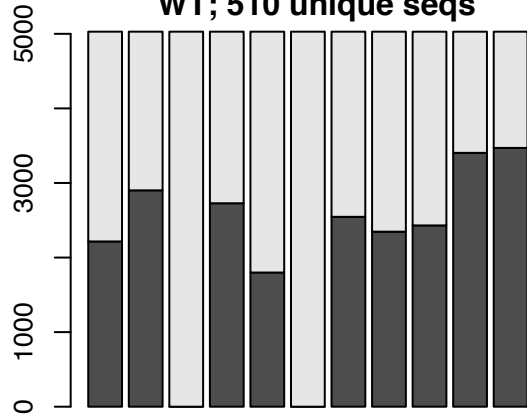

**161:G, 219:K**

**single mut; 505 unique seqs**

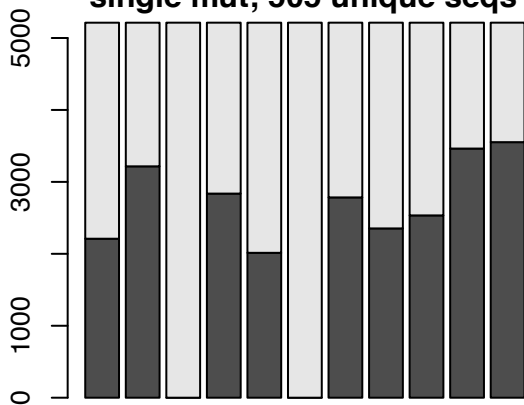

**161:D, 219:R**

**single mut; 510 unique seqs**

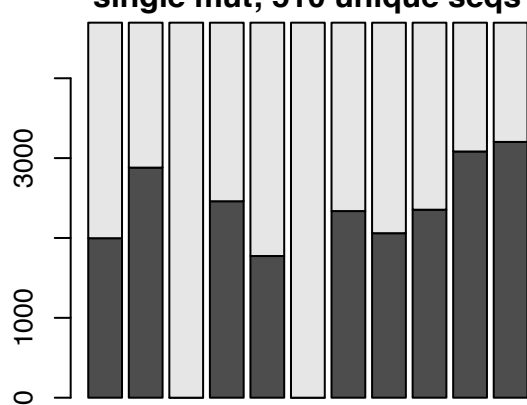

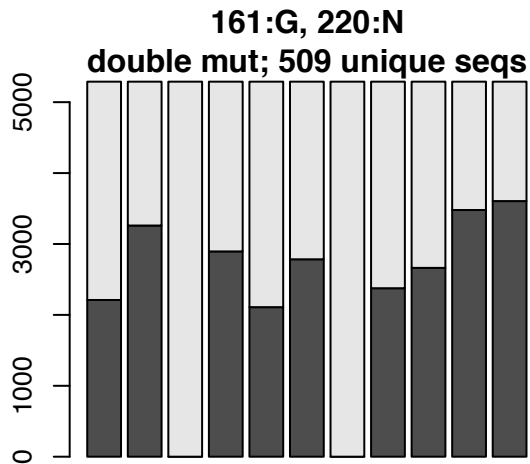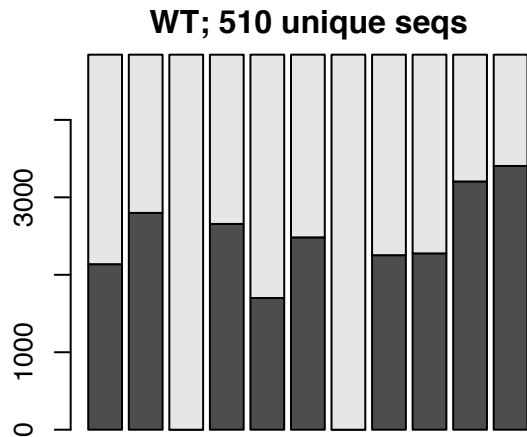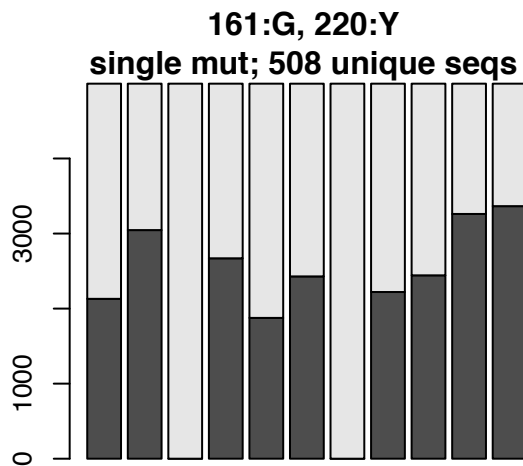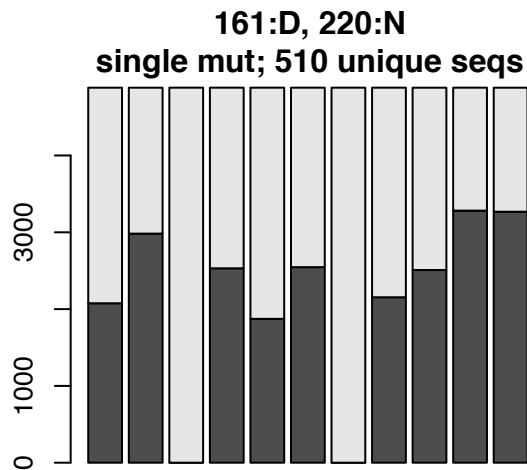

**161:G, 299:E**

**double mut; 508 unique seqs**

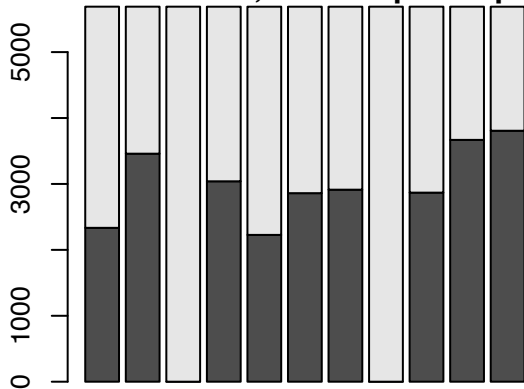

**WT; 510 unique seqs**

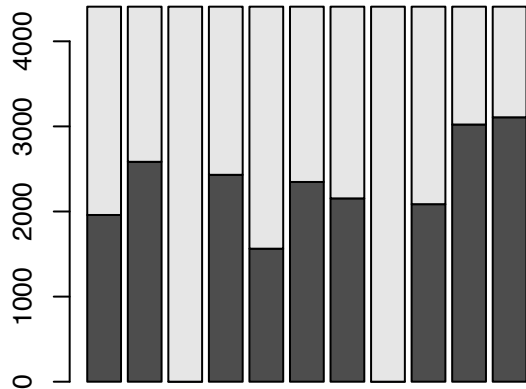

**161:G, 299:D**

**single mut; 509 unique seqs**

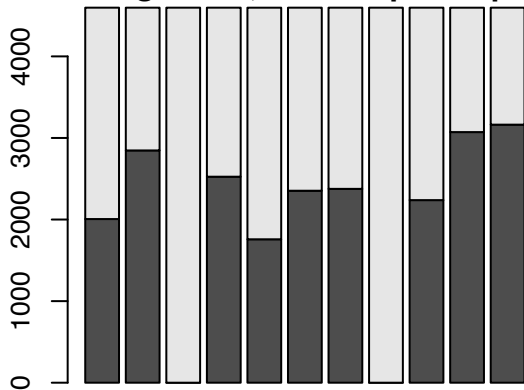

**161:D, 299:E**

**single mut; 510 unique seqs**

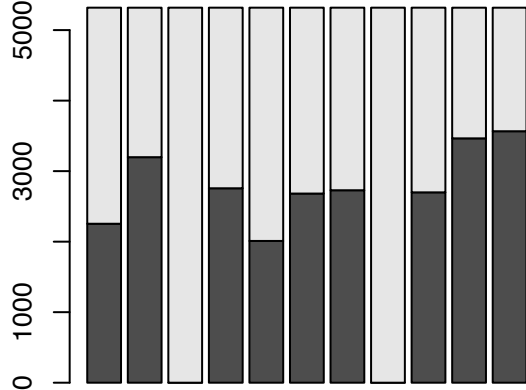

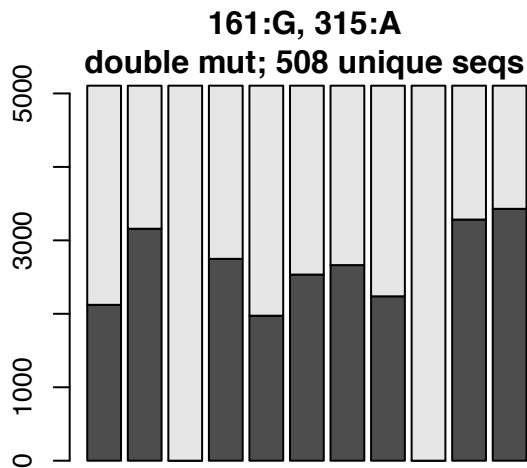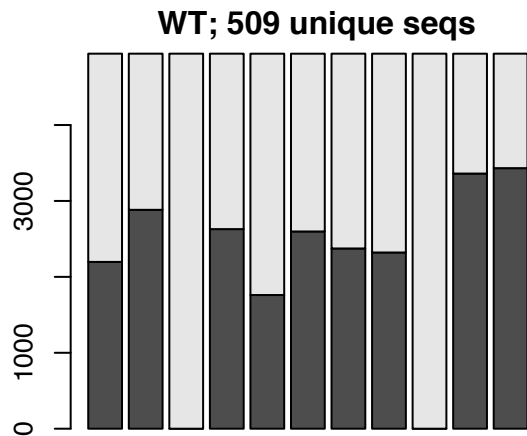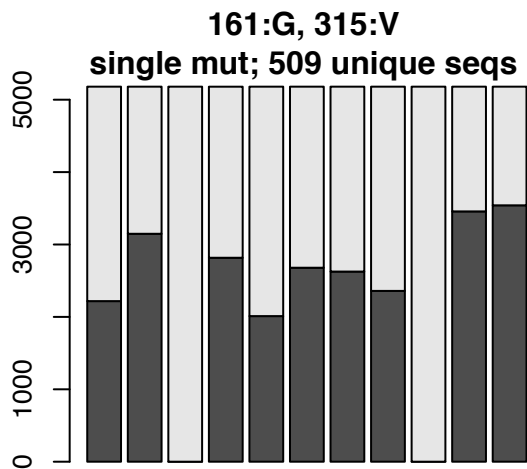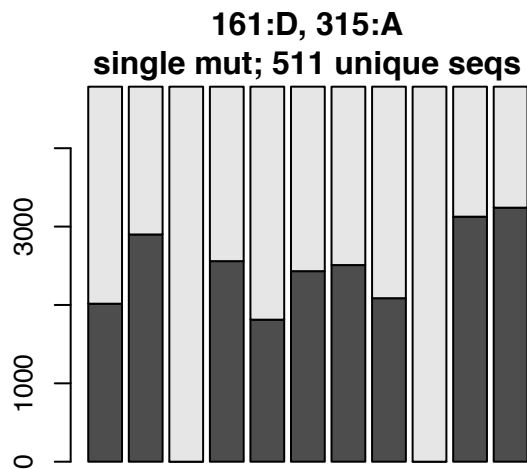

**161:G, 321:G**

**double mut; 506 unique seqs**

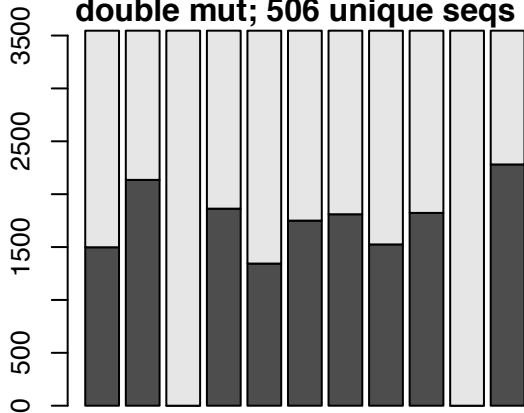

**WT; 509 unique seqs**

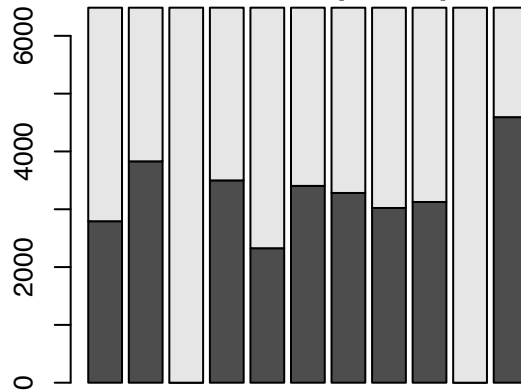

**161:G, 321:A**

**single mut; 511 unique seqs**

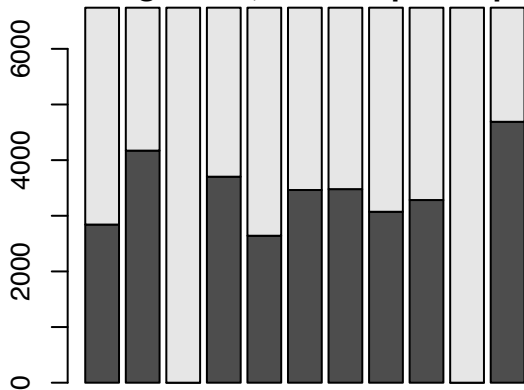

**161:D, 321:G**

**single mut ; 511 unique seqs**

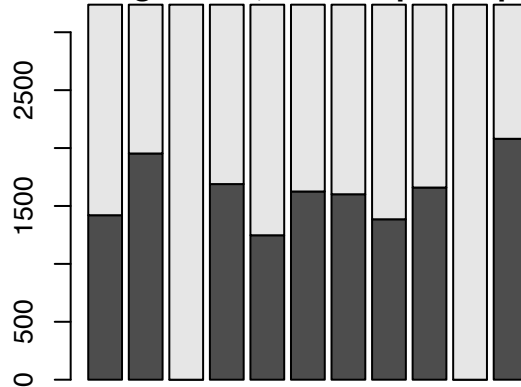

**161:G, 329:T**

**double mut; 506 unique seqs**

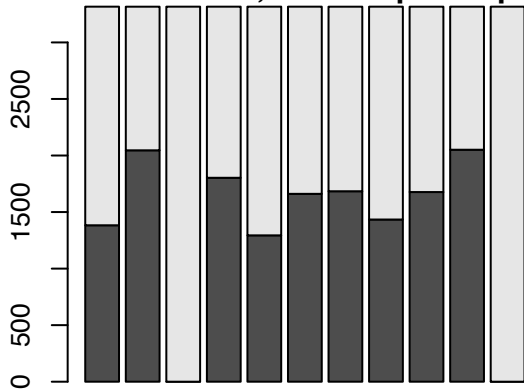

**WT; 512 unique seqs**

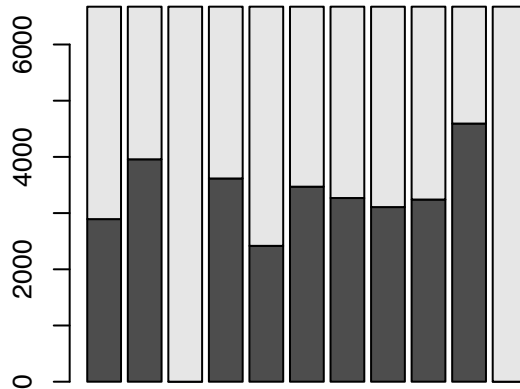

**161:G, 329:A**

**single mut ; 511 unique seqs**

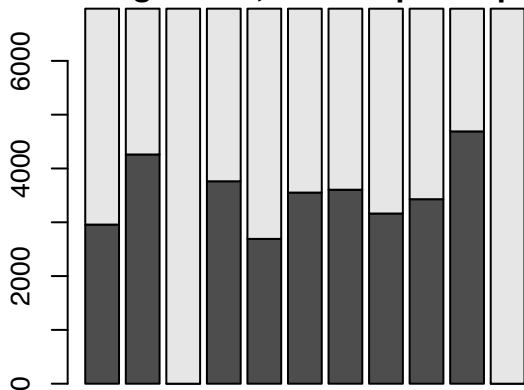

**161:D, 329:T**

**single mut; 508 unique seqs**

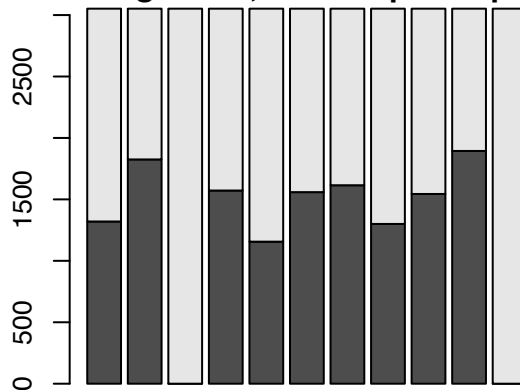

**162:Q, 173:R**

**double mut; 506 unique seqs**

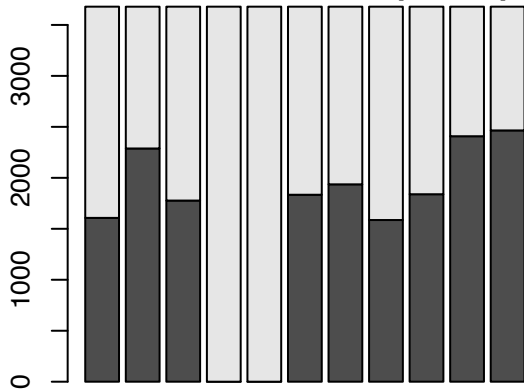

**WT; 511 unique seqs**

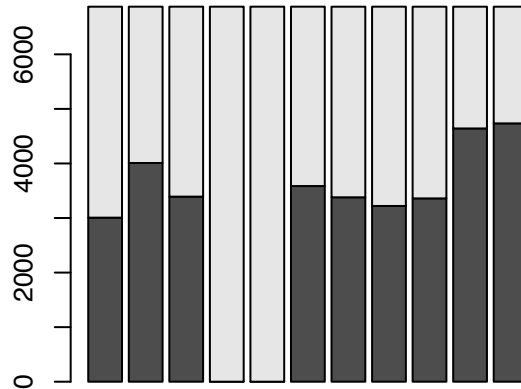

**162:Q, 173:S**

**single mut; 511 unique seqs**

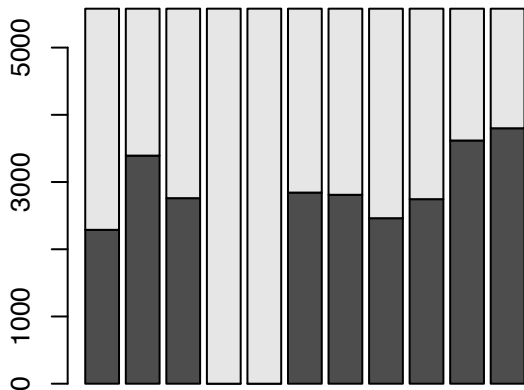

**162:H, 173:R**

**single mut; 509 unique seqs**

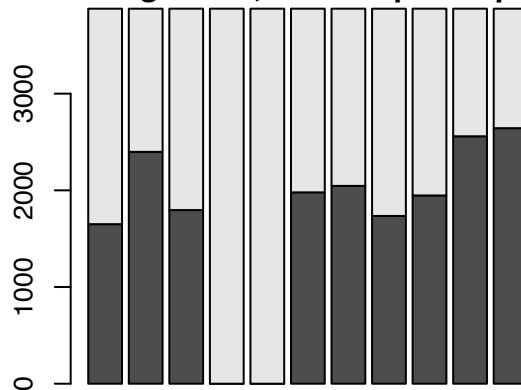



**162:Q, 219:R**

**double mut; 511 unique seqs**

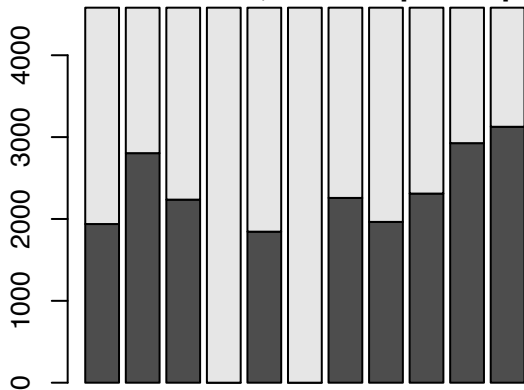

**WT; 509 unique seqs**

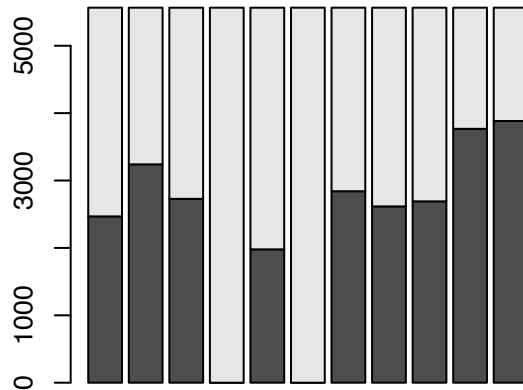

**162:Q, 219:K**

**single mut; 506 unique seqs**

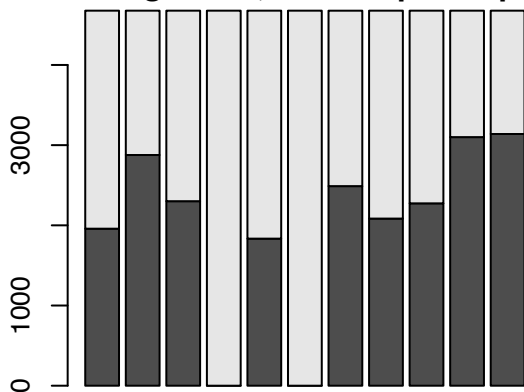

**162:H, 219:R**

**single mut; 511 unique seqs**

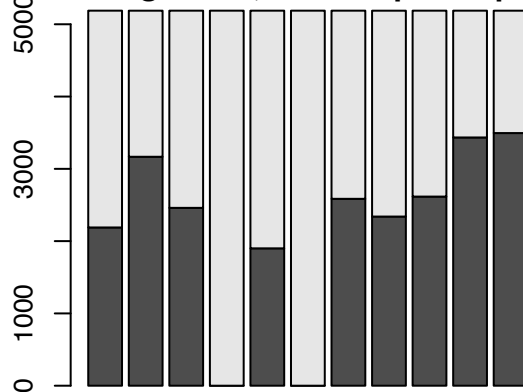

**162:Q, 220:N**

**double mut; 508 unique seqs**

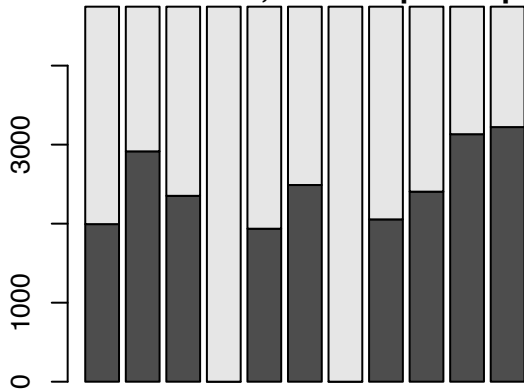

**WT; 509 unique seqs**

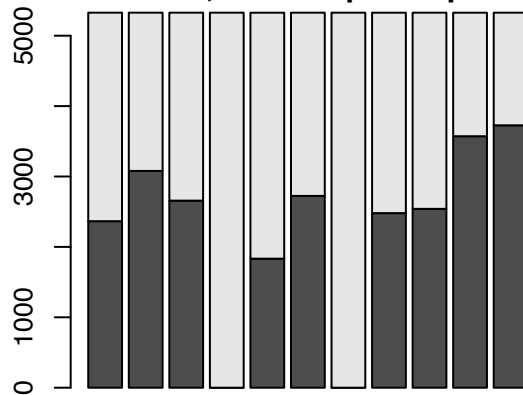

**162:Q, 220:Y**

**single mut; 509 unique seqs**

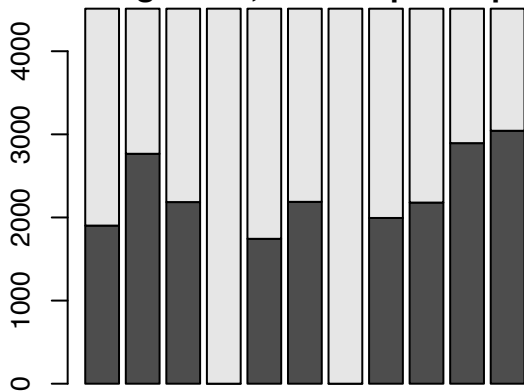

**162:H, 220:N**

**single mut; 511 unique seqs**

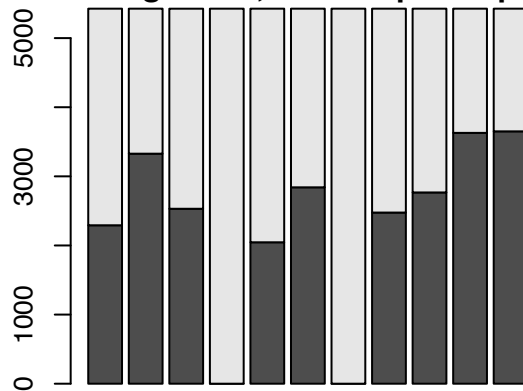

**162:Q, 299:E**

**double mut; 507 unique seqs**

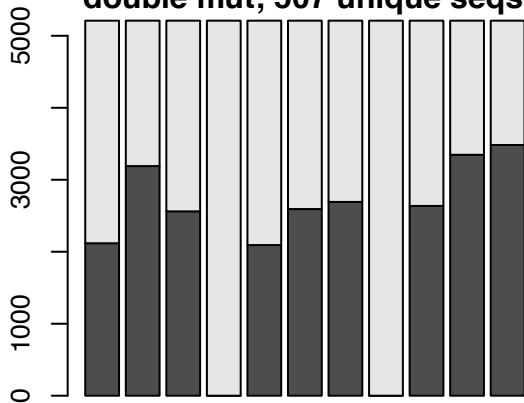

**WT; 509 unique seqs**

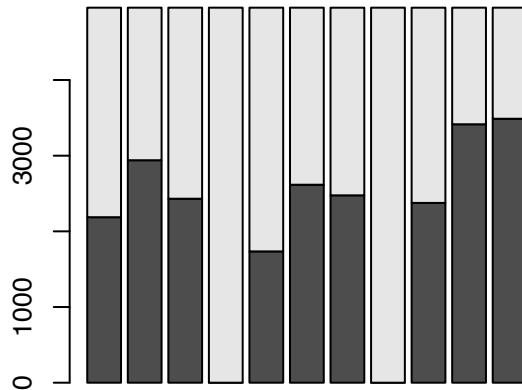

**162:Q, 299:D**

**single mut ; 510 unique seqs**

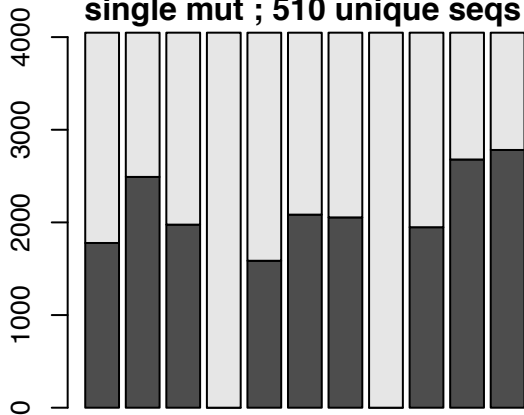

**162:H, 299:E**

**single mut ; 511 unique seqs**

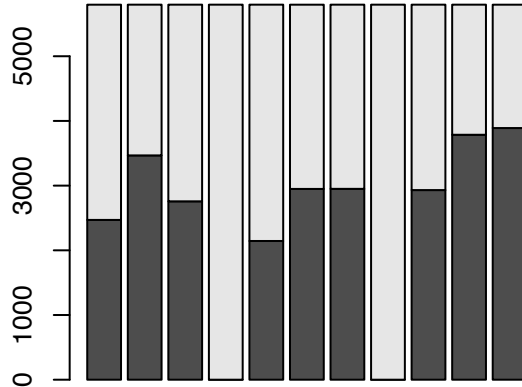

**162:Q, 315:A**

**double mut; 509 unique seqs**

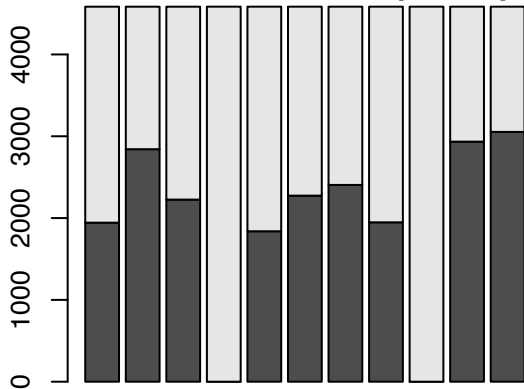

**WT; 510 unique seqs**

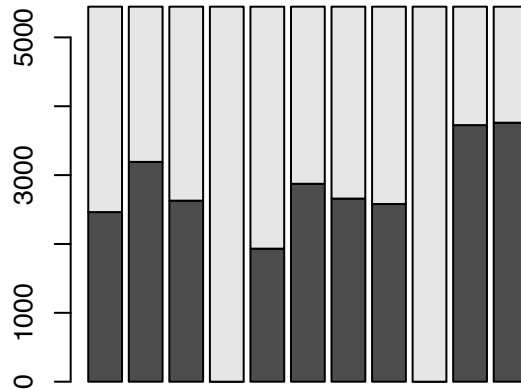

**162:Q, 315:V**

**single mut; 508 unique seqs**

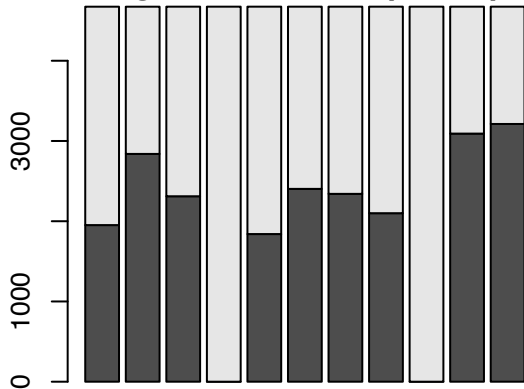

**162:H, 315:A**

**single mut; 510 unique seqs**

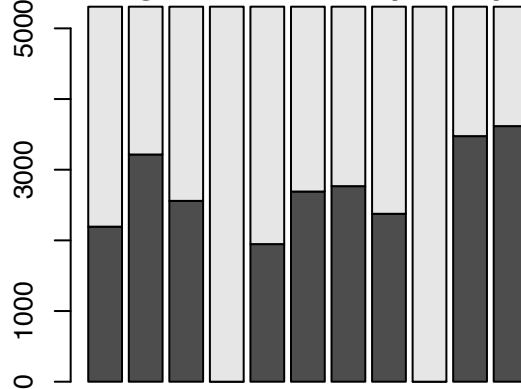

**162:Q, 321:G**

**double mut; 508 unique seqs**

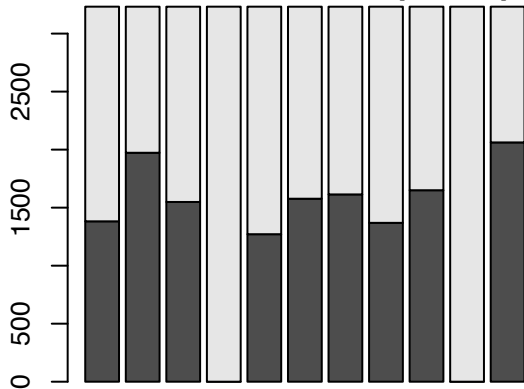

**WT; 511 unique seqs**

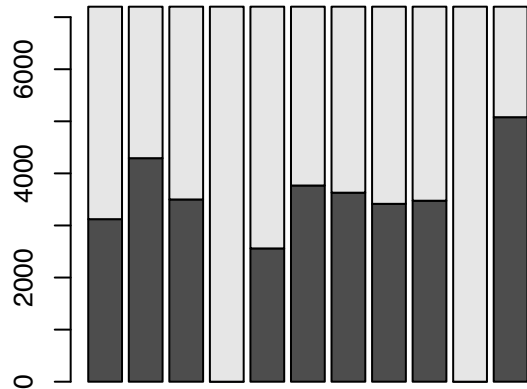

**162:Q, 321:A**

**single mut; 509 unique seqs**

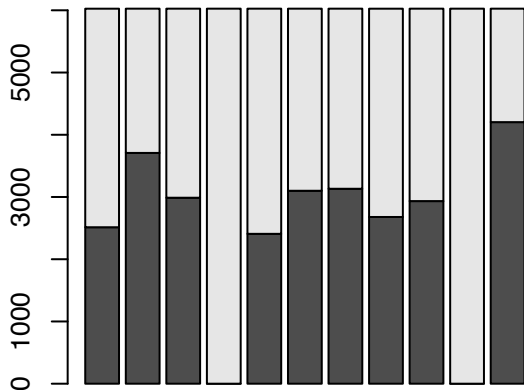

**162:H, 321:G**

**single mut; 509 unique seqs**

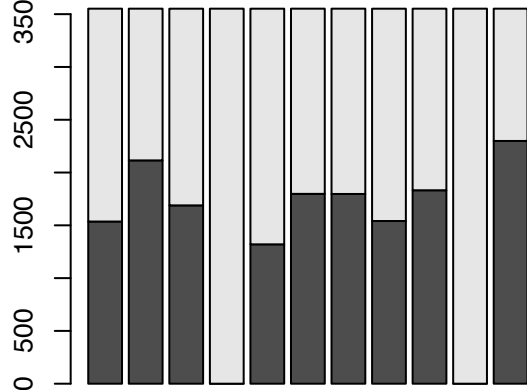

**162:Q, 329:T**

**double mut; 505 unique seqs**

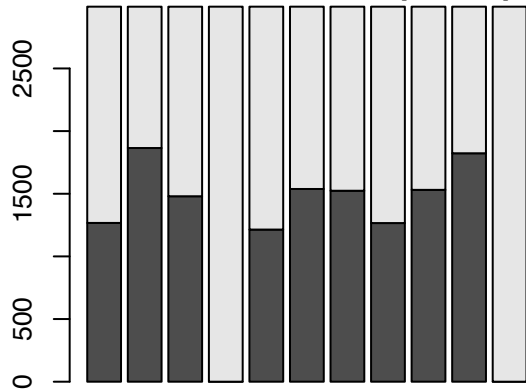

**WT; 511 unique seqs**

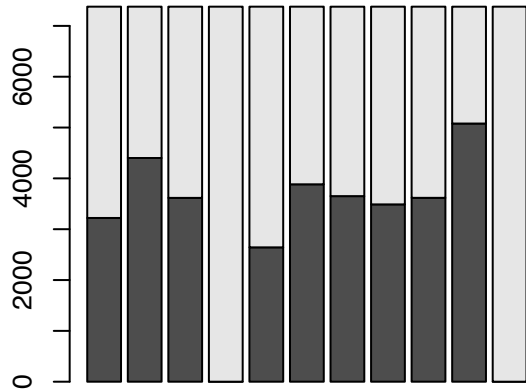

**162:Q, 329:A**

**single mut; 512 unique seqs**

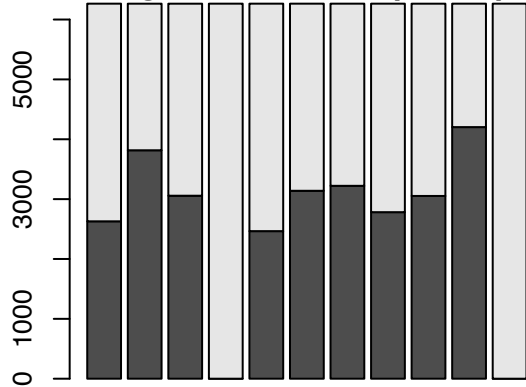

**162:H, 329:T**

**single mut; 509 unique seqs**

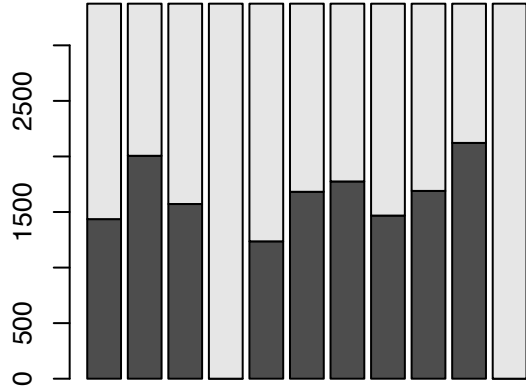

**173:R, 219:R**

**double mut; 511 unique seqs**

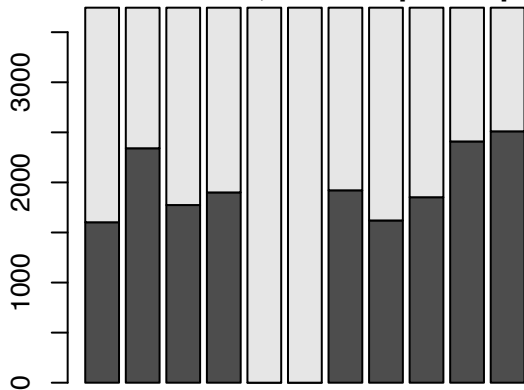

**WT; 511 unique seqs**

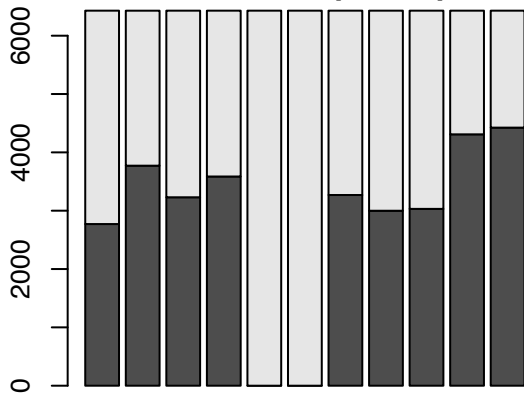

**173:R, 219:K**

**single mut; 504 unique seqs**

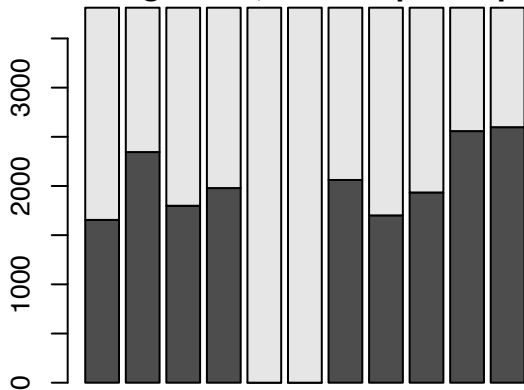

**173:S, 219:R**

**single mut; 511 unique seqs**

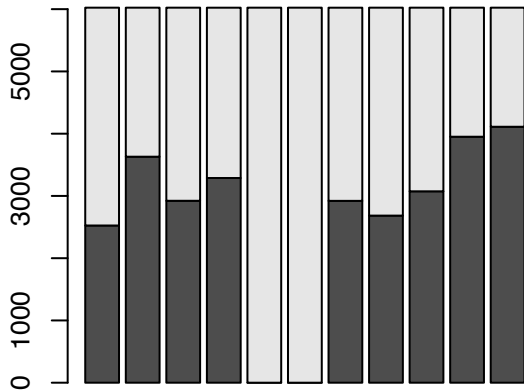

**173:R, 220:N**

**double mut; 508 unique seqs**

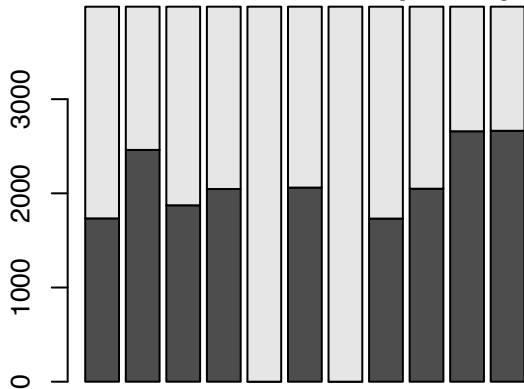

**WT; 511 unique seqs**

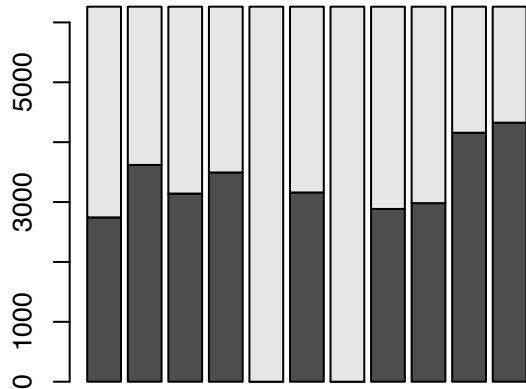

**173:R, 220:Y**

**single mut; 507 unique seqs**

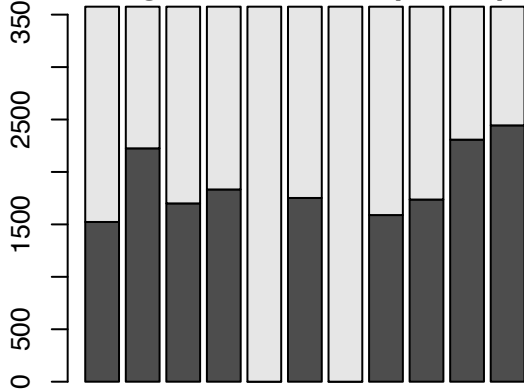

**173:S, 220:N**

**single mut; 511 unique seqs**

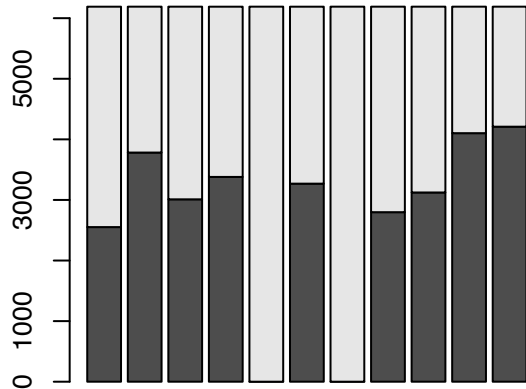



**173:R, 299:E**

**double mut; 508 unique seqs**

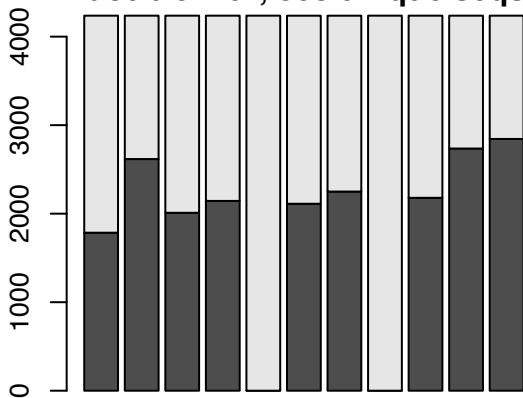

**WT; 512 unique seqs**

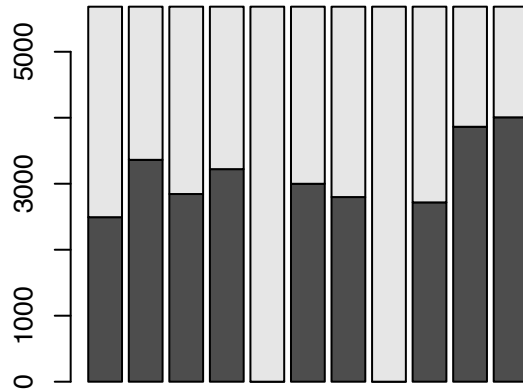

**173:R, 299:D**

**single mut; 507 unique seqs**

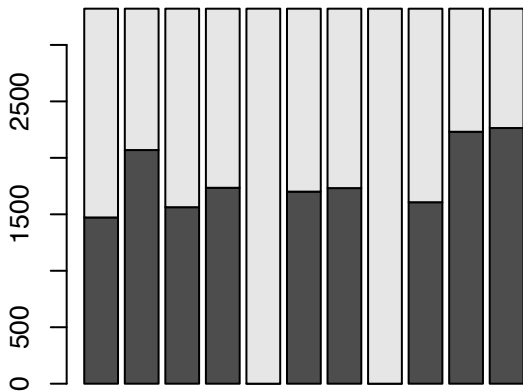

**173:S, 299:E**

**single mut; 510 unique seqs**

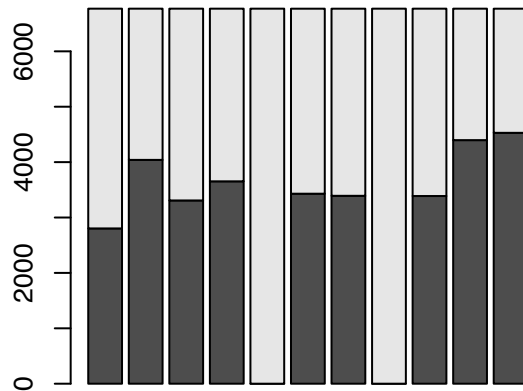

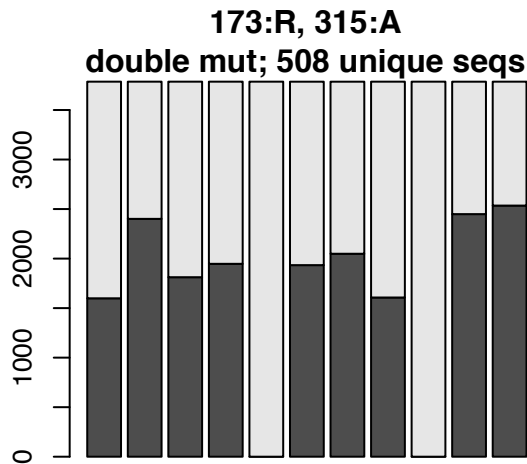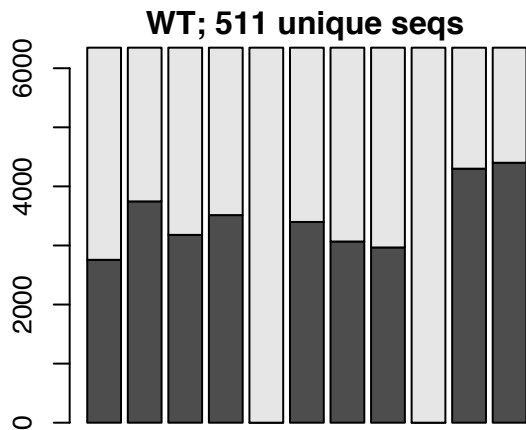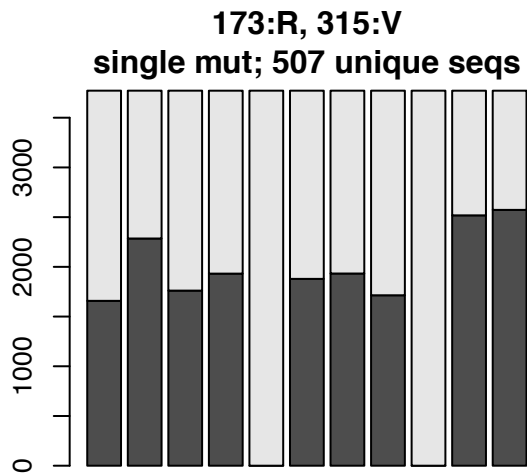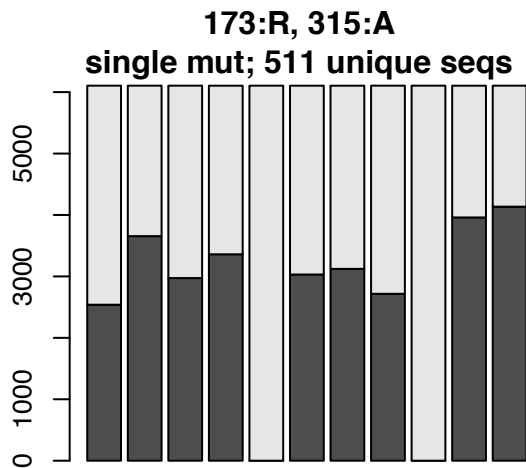

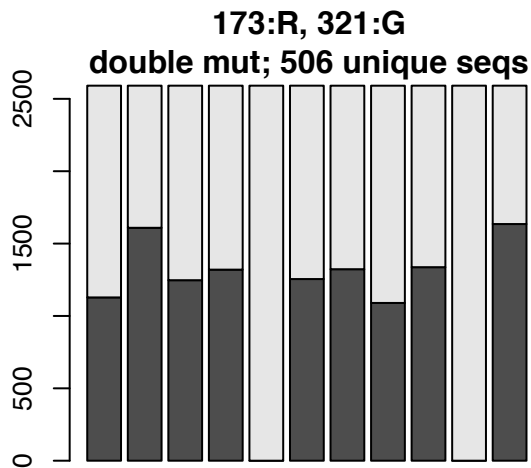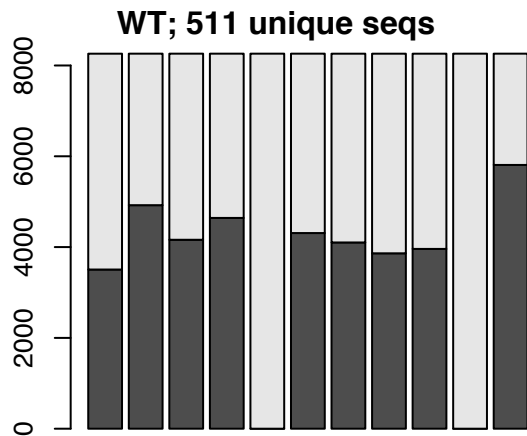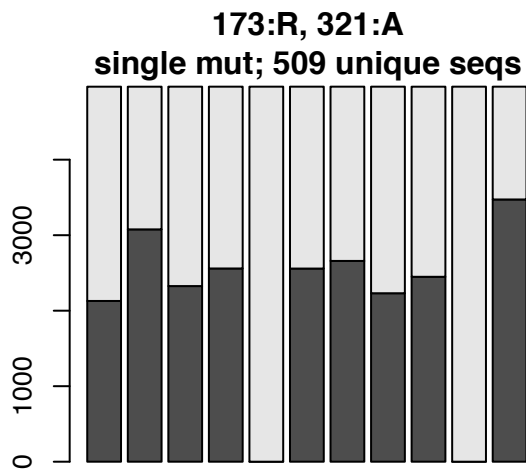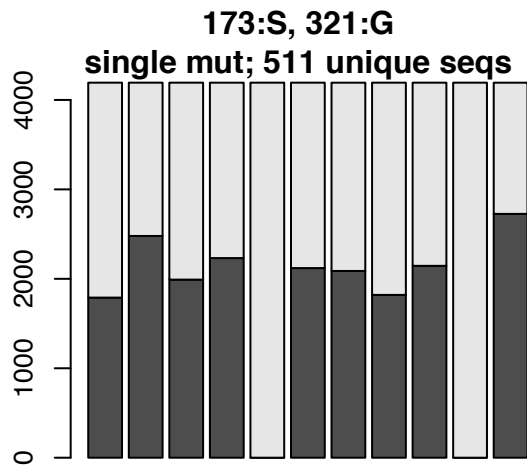

**173:R, 329:T**

**double mut; 504 unique seqs**

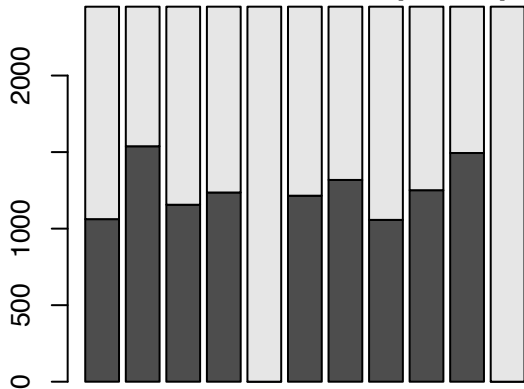

**WT; 512 unique seqs**

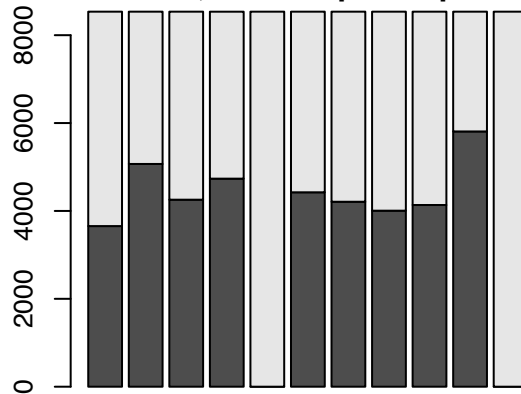

**173:R, 329:A**

**single mut; 511 unique seqs**

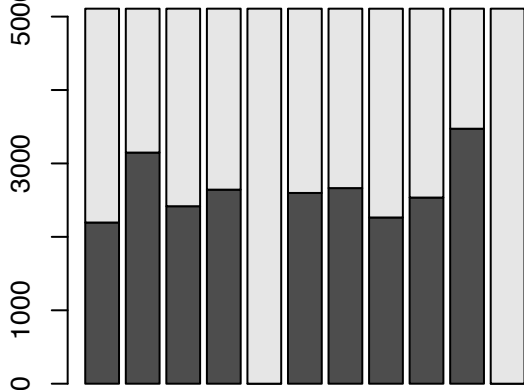

**173:S, 329:T**

**single mut; 510 unique seqs**

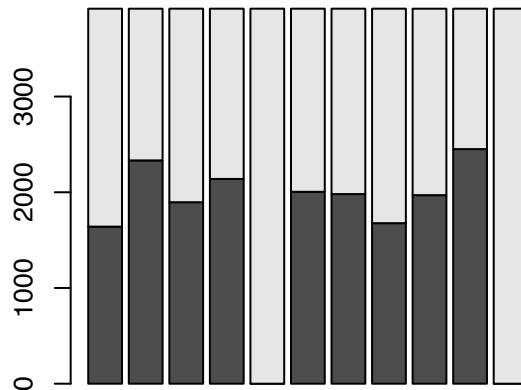

**219:R, 220:N**

**double mut; 512 unique seqs**

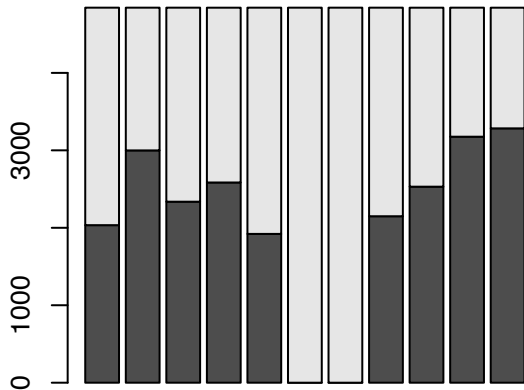

**WT; 508 unique seqs**

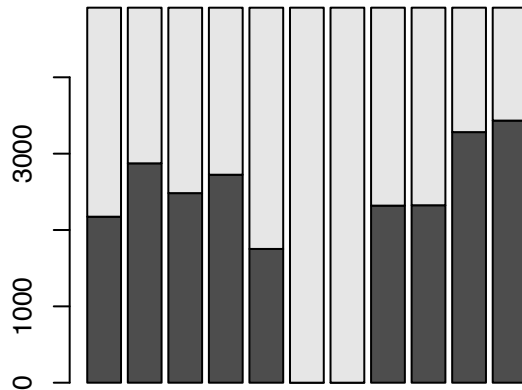

**219:R, 220:Y**

**single mut; 510 unique seqs**

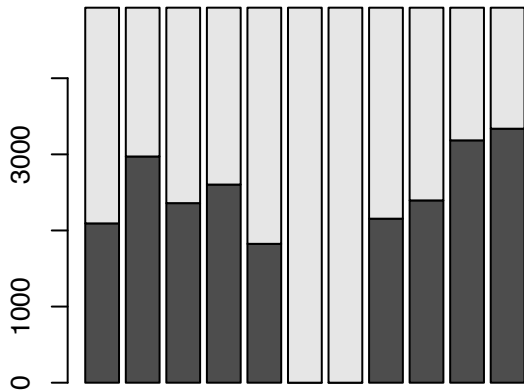

**219:K, 220:N**

**single mut; 507 unique seqs**

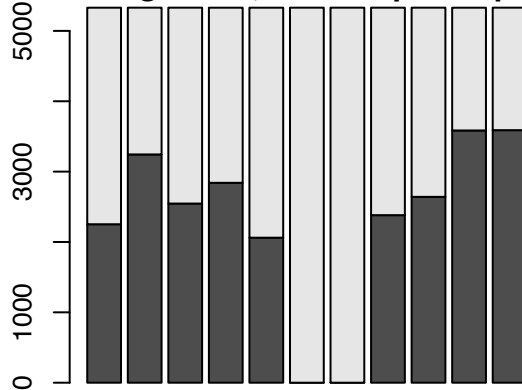

**219:R, 299:E**

**double mut; 511 unique seqs**

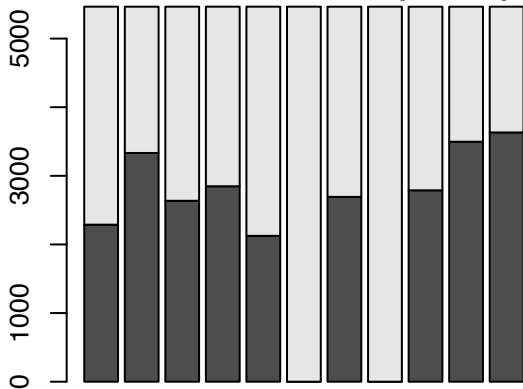

**WT; 508 unique seqs**

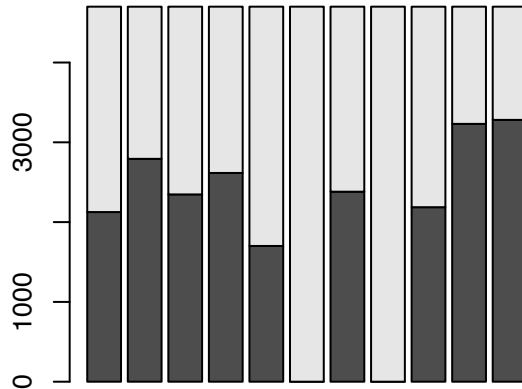

**219:R, 299:D**

**single mut; 511 unique seqs**

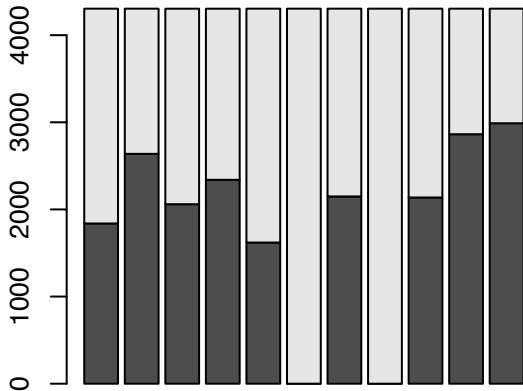

**219:K, 299:E**

**single mut; 507 unique seqs**

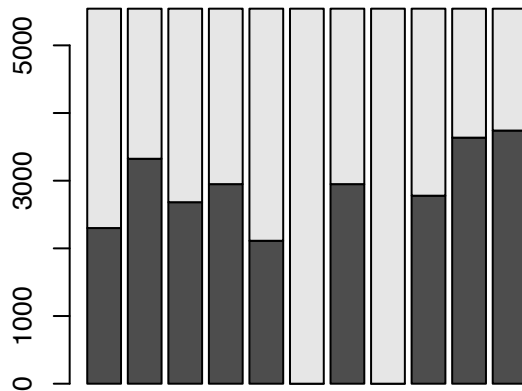

**219:R, 315:A**

**double mut; 512 unique seqs**

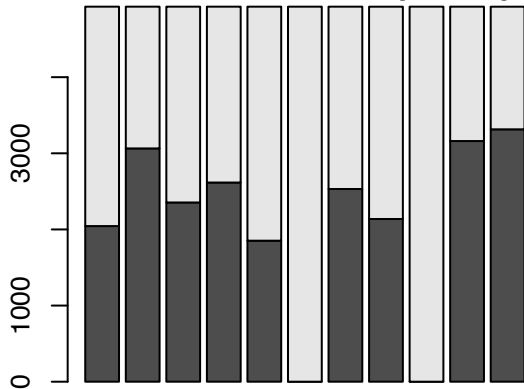

**WT; 508 unique seqs**

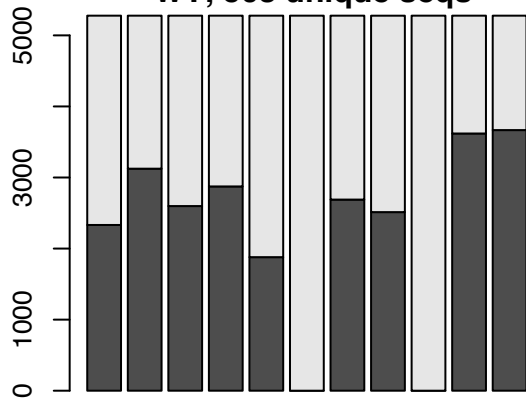

**219:R, 315:V**

**single mut; 510 unique seqs**

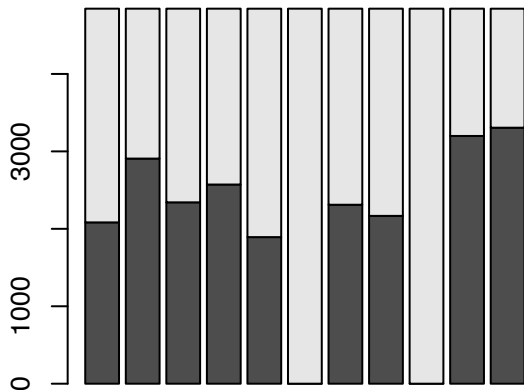

**219:K, 315:A**

**single mut; 507 unique seqs**

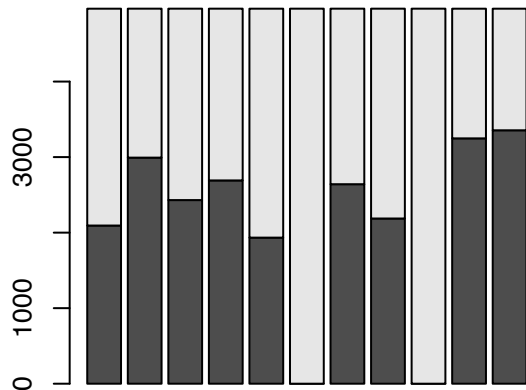

**299:R, 321:G**

**double mut; 511 unique seqs**

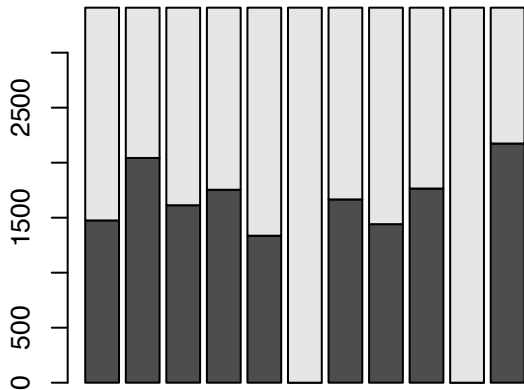

**WT; 509 unique seqs**

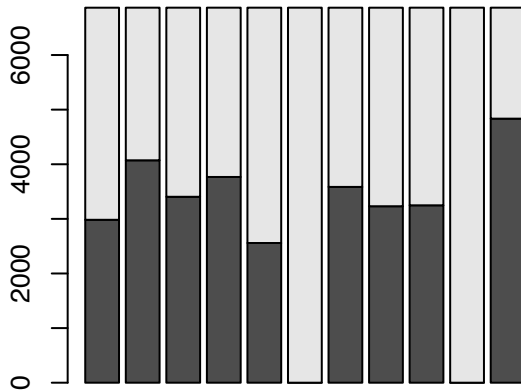

**299:R, 321:A**

**single mut; 511 unique seqs**

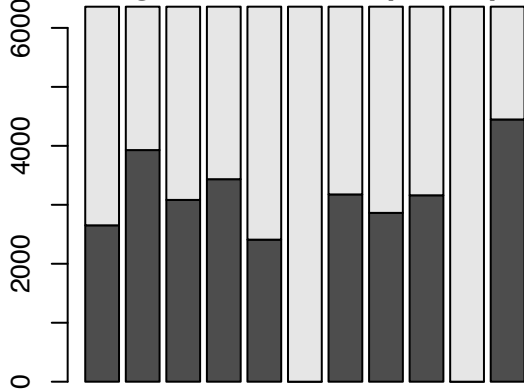

**299:K, 321:G**

**single mut; 506 unique seqs**

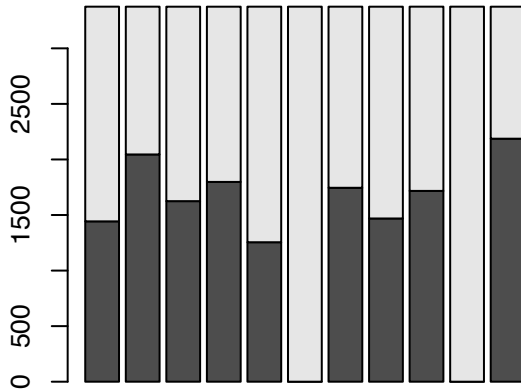



**219:R, 321:T**

**double mut; 510 unique seqs**

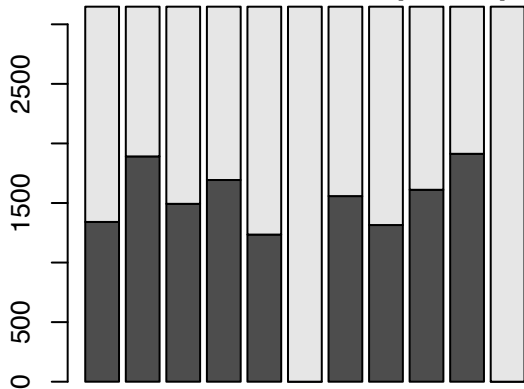

**WT; 511 unique seqs**

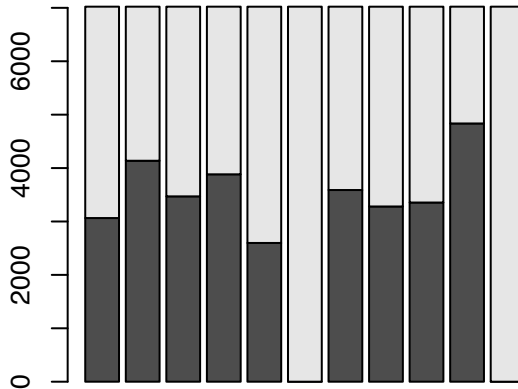

**219:R, 321:A**

**single mut; 512 unique seqs**

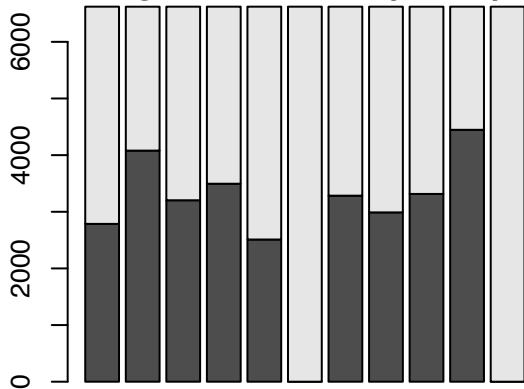

**219:K, 321:T**

**single mut; 504 unique seqs**

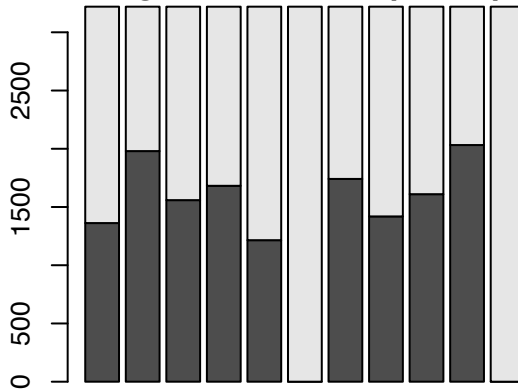

**220:N, 299:E**

**double mut; 509 unique seqs**

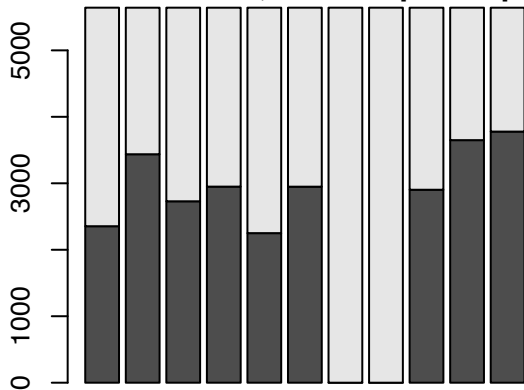

**WT; 509 unique seqs**

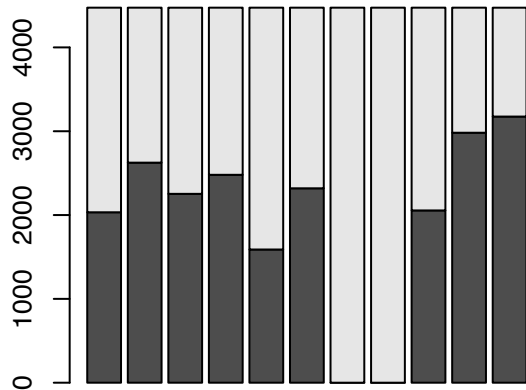

**220:N, 299:D**

**single mut; 510 unique seqs**

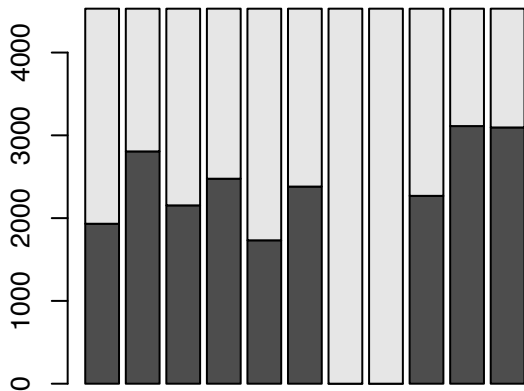

**220:Y, 299:E**

**single mut; 509 unique seqs**

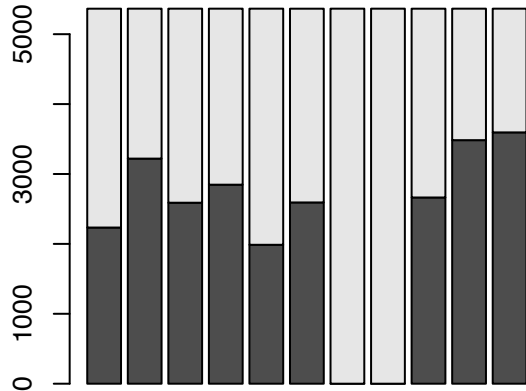

**220:N, 315:A**

**double mut; 509 unique seqs**

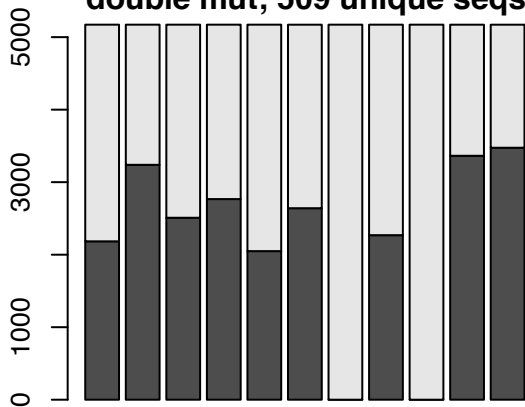

**WT; 508 unique seqs**

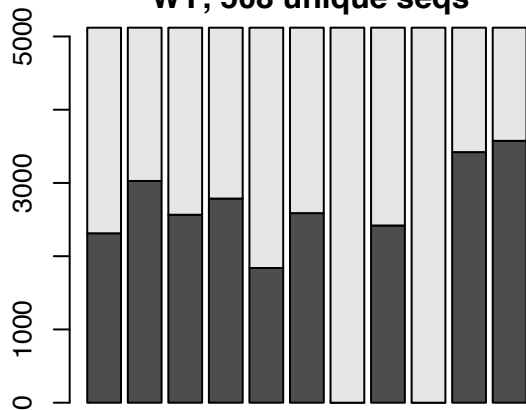

**220:N, 315:V**

**single mut; 510 unique seqs**

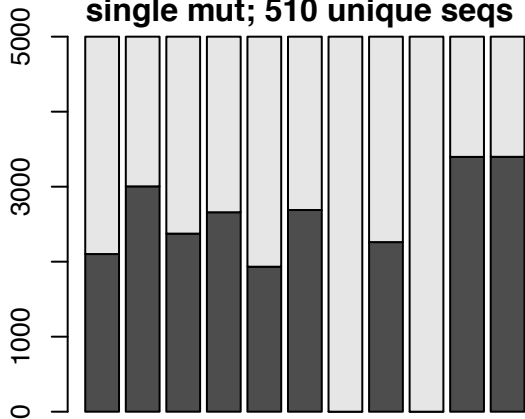

**220:Y, 315:A**

**single mut; 510 unique seqs**

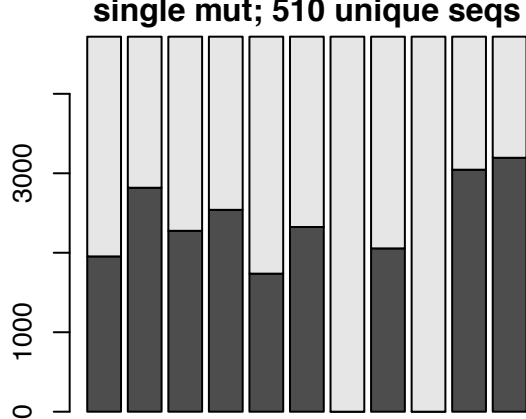

**220:N, 321:G**

**double mut; 510 unique seqs**

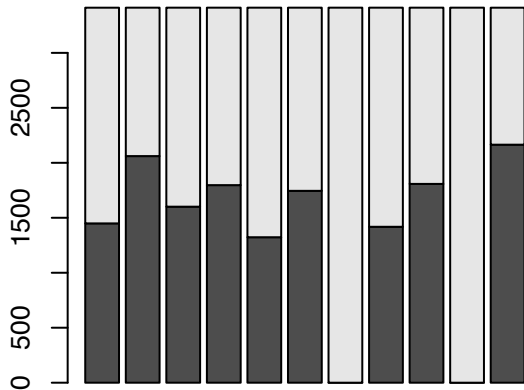

**WT; 511 unique seqs**

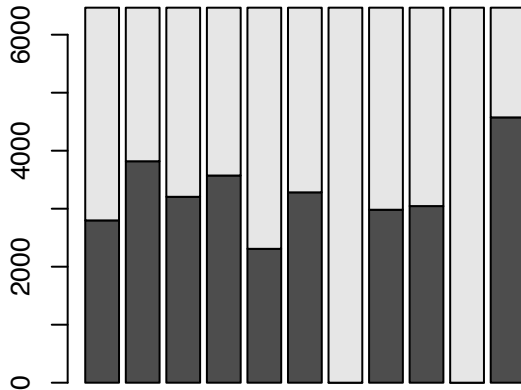

**220:N, 321:A**

**single mut; 509 unique seqs**

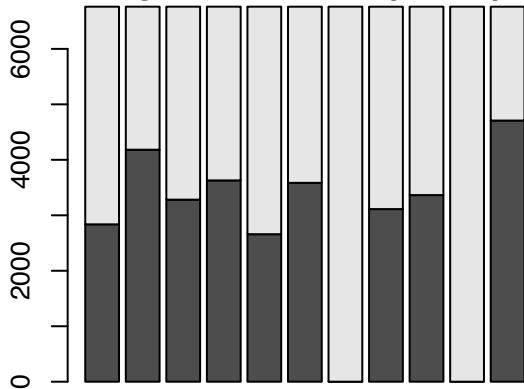

**220:Y, 321:G**

**single mut; 507 unique seqs**

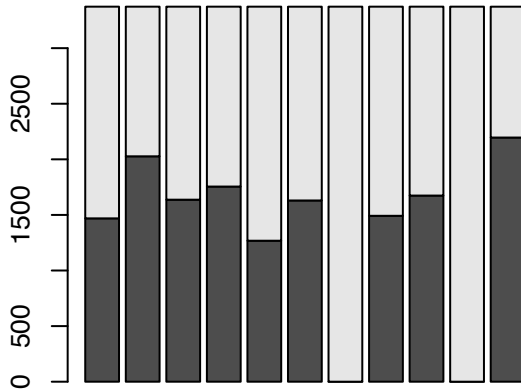

**220:N, 329:T**

**double mut; 507 unique seqs**

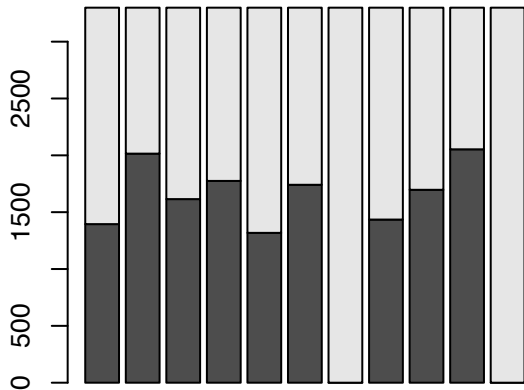

**WT; 511 unique seqs**

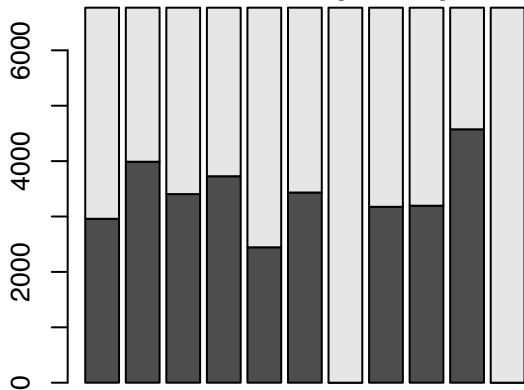

**220:N, 329:A**

**single mut; 512 unique seqs**

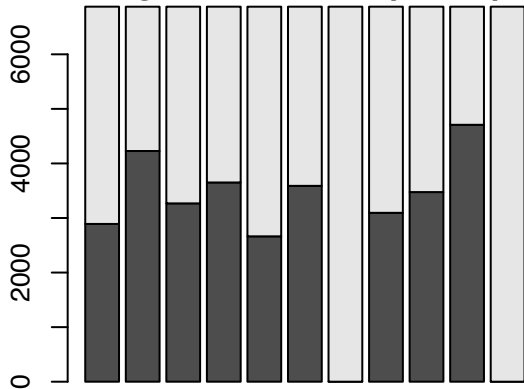

**220:Y, 329:T**

**single mut; 507 unique seqs**

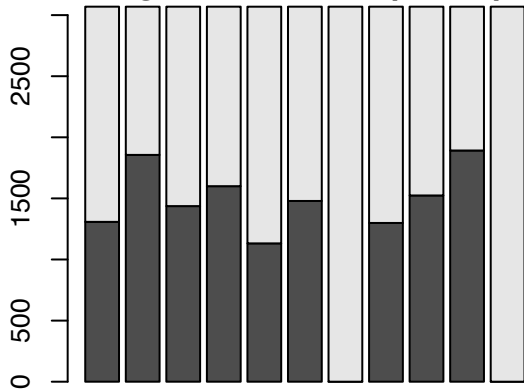

**299:E, 315:A**

**double mut; 509 unique seqs**

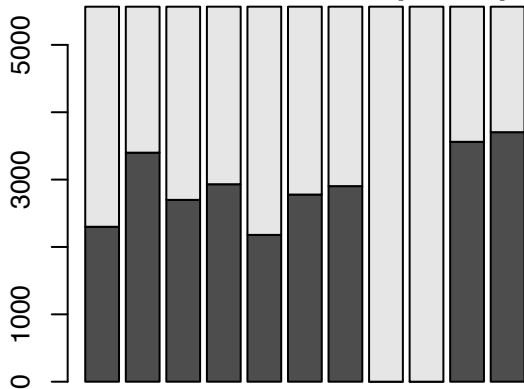

**WT; 509 unique seqs**

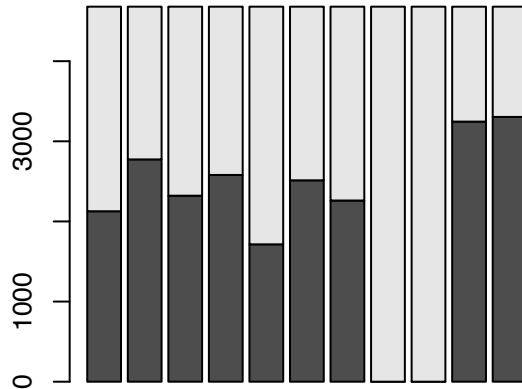

**299:E, 315:V**

**single mut; 509 unique seqs**

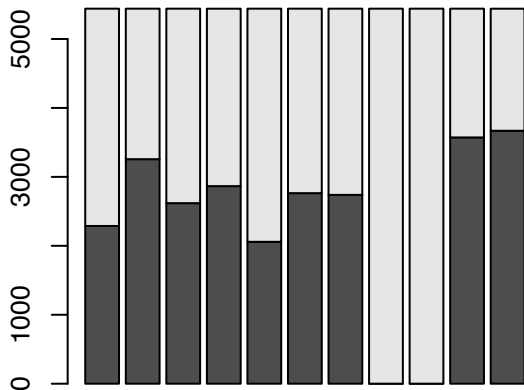

**299:D, 315:A**

**single mut; 510 unique seqs**

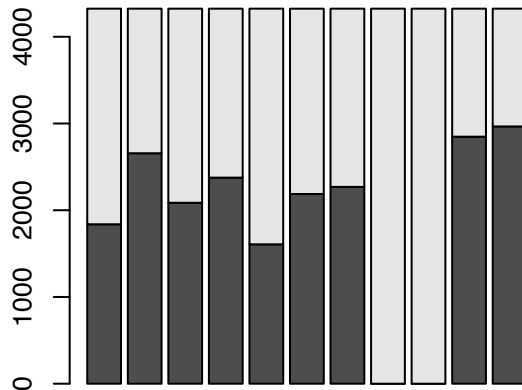

**299:E, 321:G**

**double mut; 508 unique seqs**

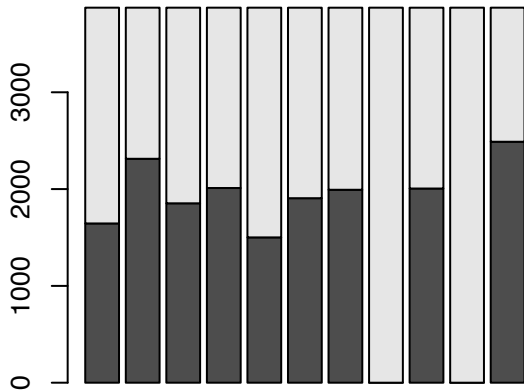

**WT; 510 unique seqs**

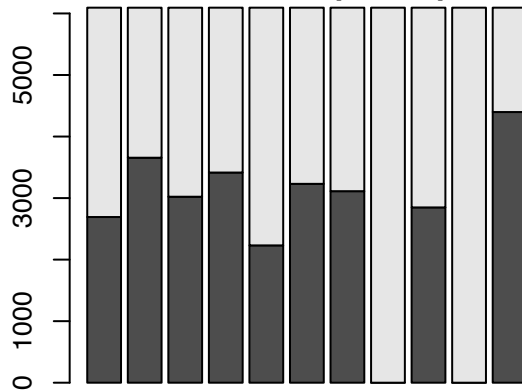

**299:E, 321:A**

**single mut; 510 unique seqs**

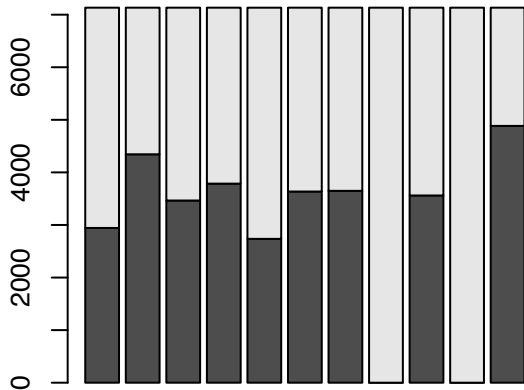

**299:D, 321:G**

**single mut; 509 unique seqs**

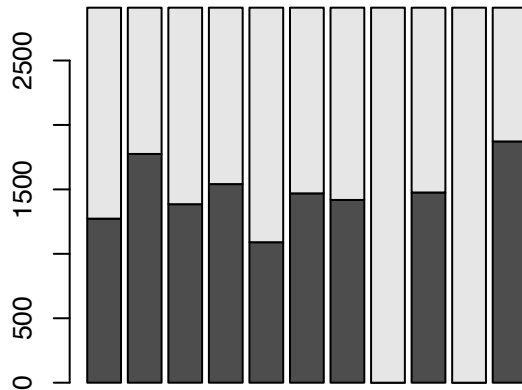

**299:E, 329:T**

**double mut; 506 unique seqs**

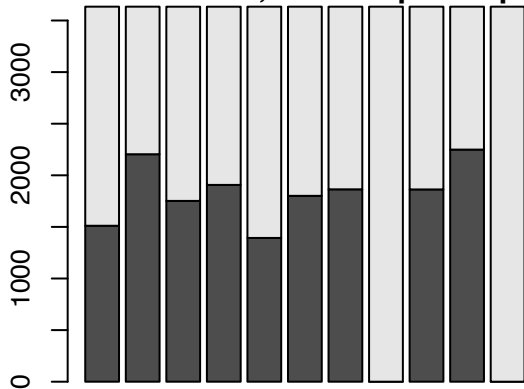

**WT; 511 unique seqs**

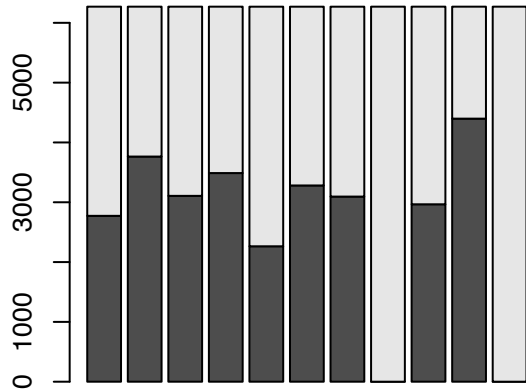

**299:E, 329:A**

**single mut; 512 unique seqs**

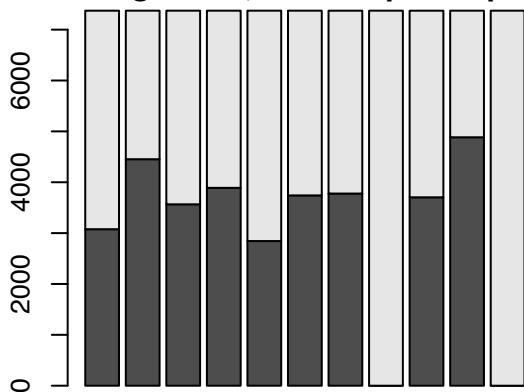

**299:D, 329:T**

**single mut; 508 unique seqs**

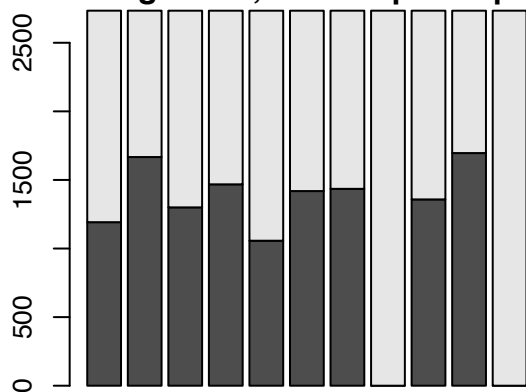



**315:A, 321:G**

**double mut; 509 unique seqs**

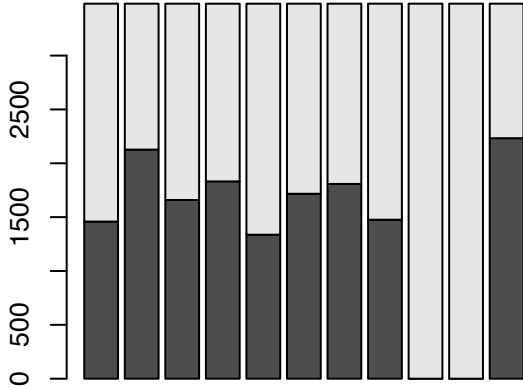

**WT ; 510 unique seqs**

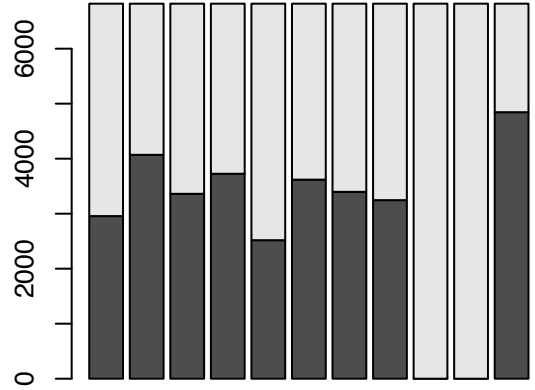

**315:A, 321:A**

**single mut; 510 unique seqs**

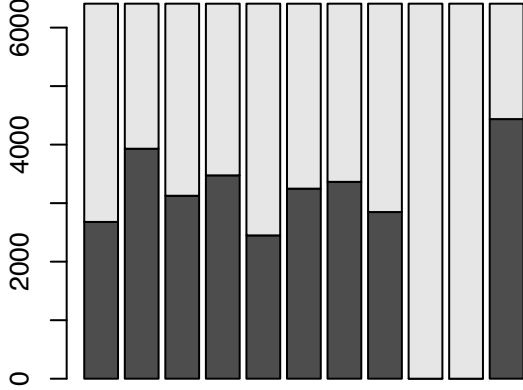

**315:V, 321:G**

**single mut; 508 unique seqs**

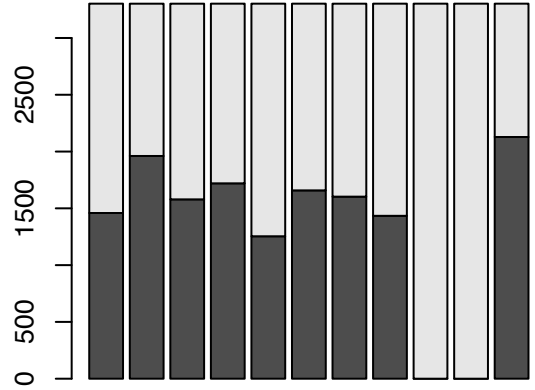

**315:A, 329:T**

**double mut; 508 unique seqs**

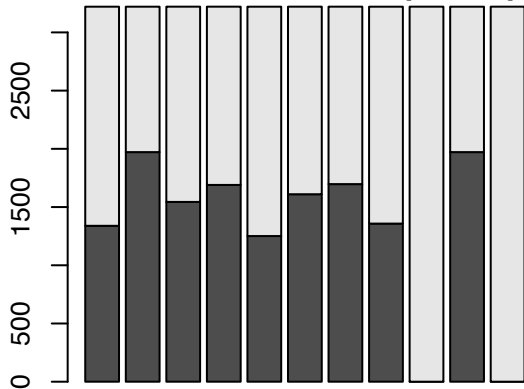

**WT; 512 unique seqs**

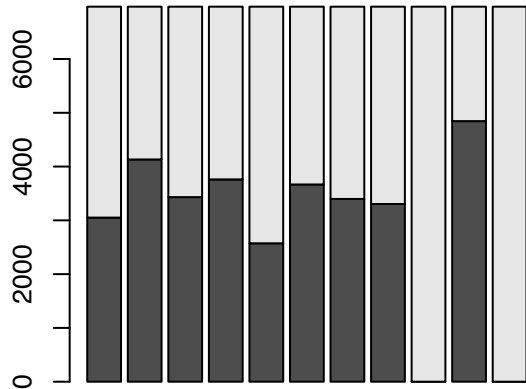

**315:A, 329:A**

**single mut; 511 unique seqs**

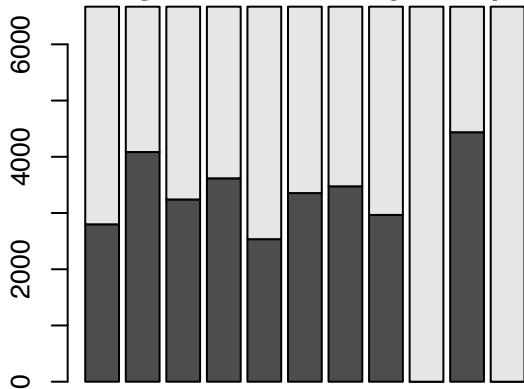

**315:V, 329:T**

**single mut; 506 unique seqs**

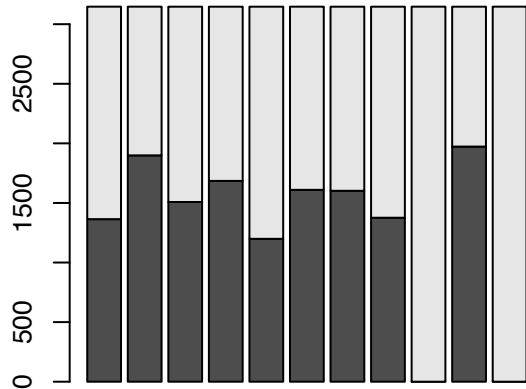

**321:G, 329:T**

**double mut; 506 unique seqs**

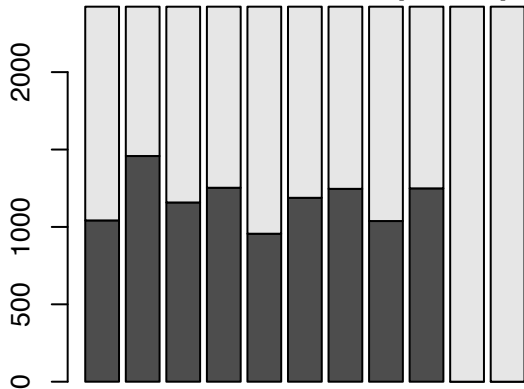

**WT; 512 unique seqs**

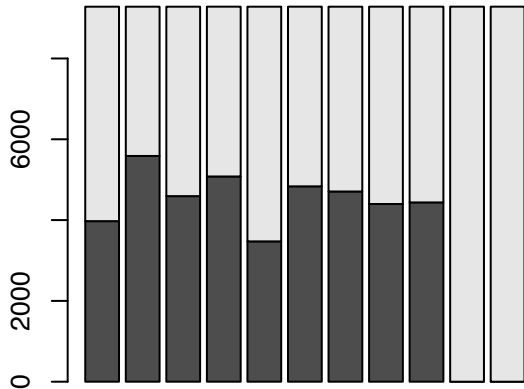

**321:G, 329:A**

**single mut; 511 unique seqs**

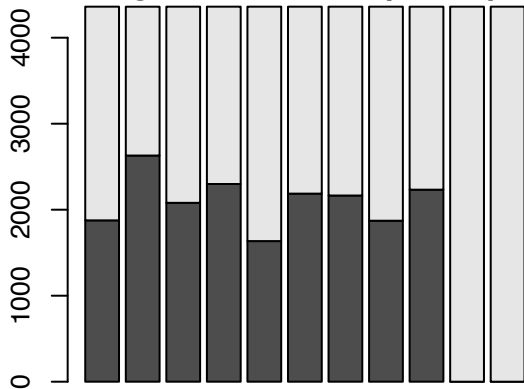

**321:A, 329:T**

**single mut; 508 unique seqs**

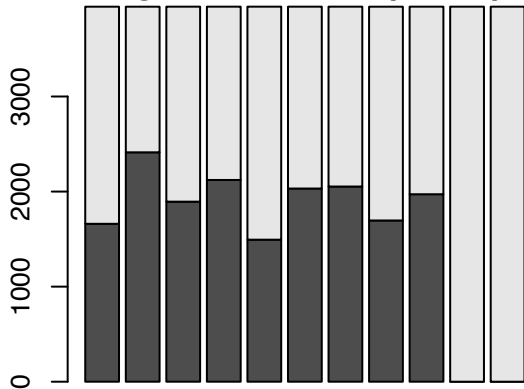

Supplement: elife-58061-supp4.pdf [file elife-58061-supp4.pdf]
