# Supplementary material for: Primary and promiscuous functions coexist during evolutionary innovation through whole protein domain acquisitions
Source: PubMed Central journal article supplement (PMC7790495; doi:10.7554/elife.58061), 2020-12-15

# Fitness Distribution Observed

## E103K

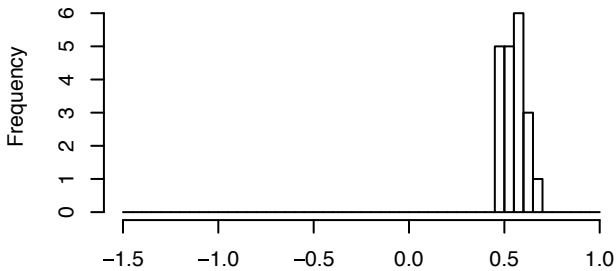

## T118S

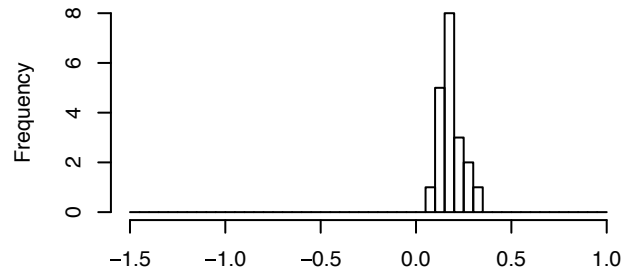

## D161G

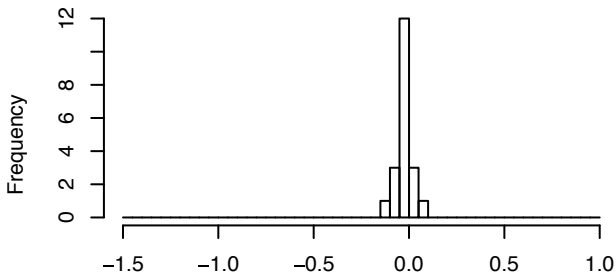

## H162Q

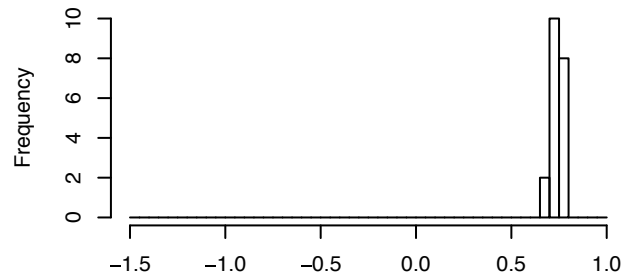

## S173R

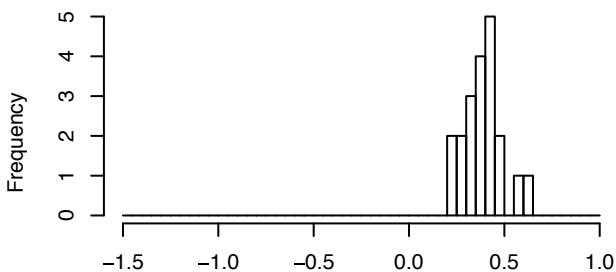

## K219R

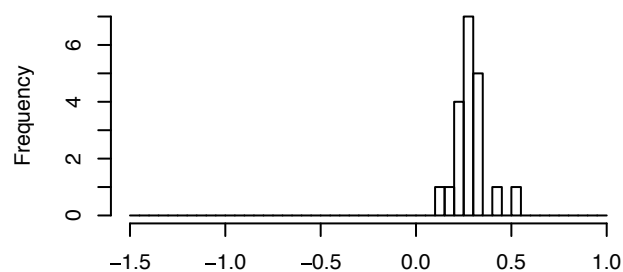

**Y220N**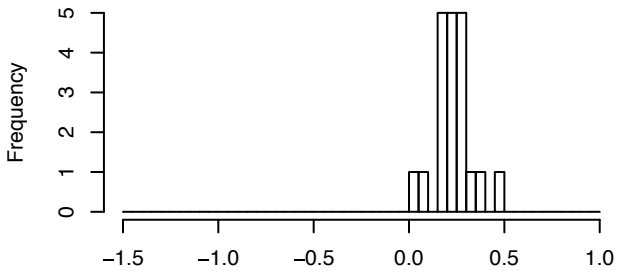**D299E**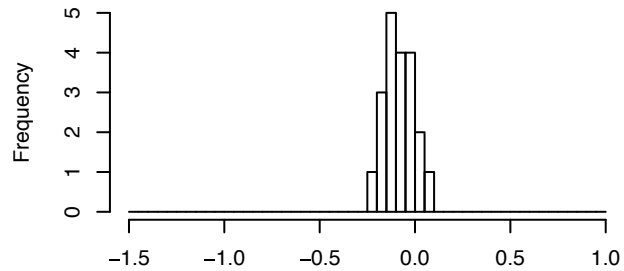**V315A**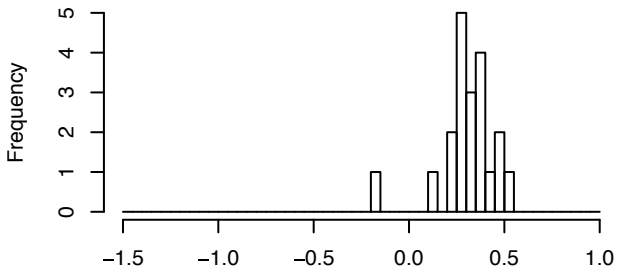**A321G**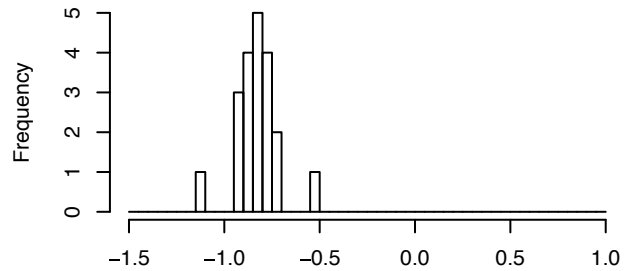**A329T**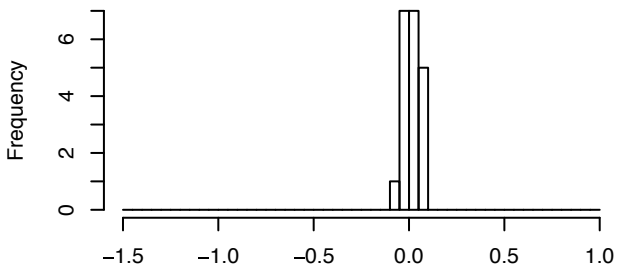

# Fitness Distribution Simulated

## E103K

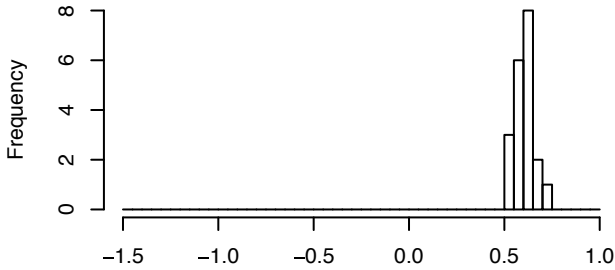

## T118S

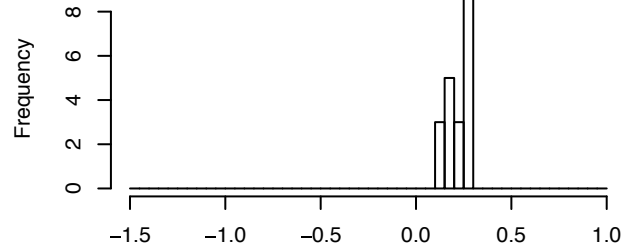

## D161G

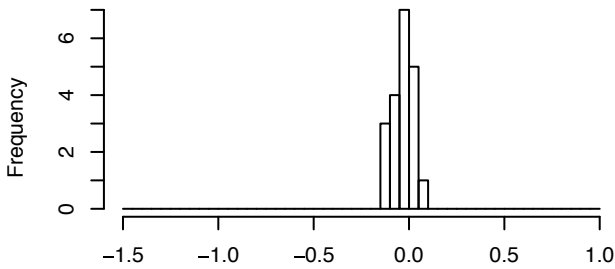

## H162Q

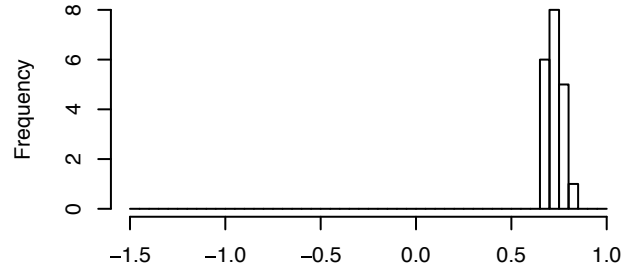

## S173R

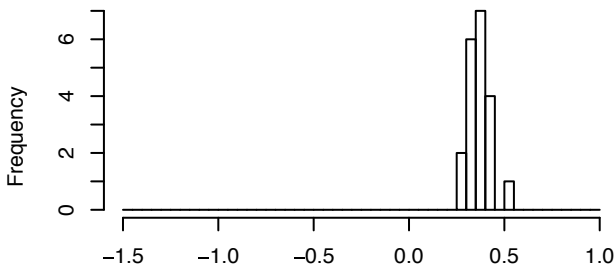

## K219R

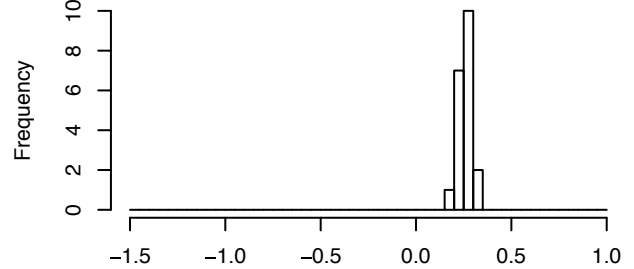

**Y220N**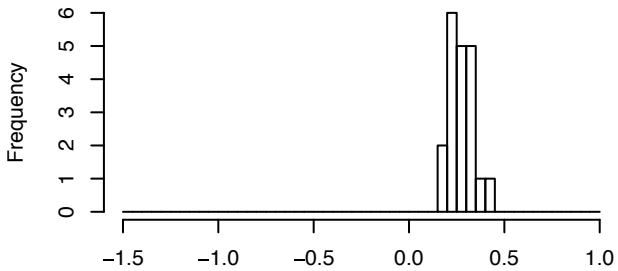**D299E**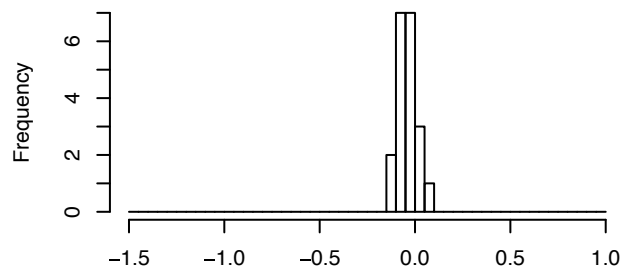**V315A**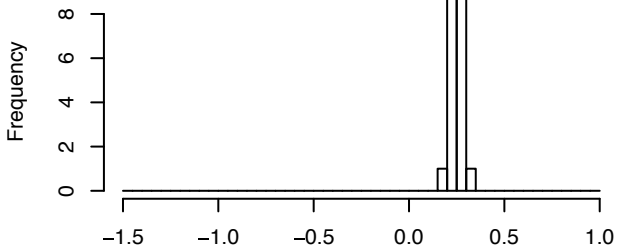**A321G**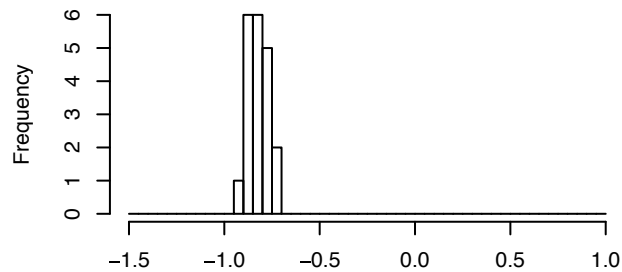**A329T**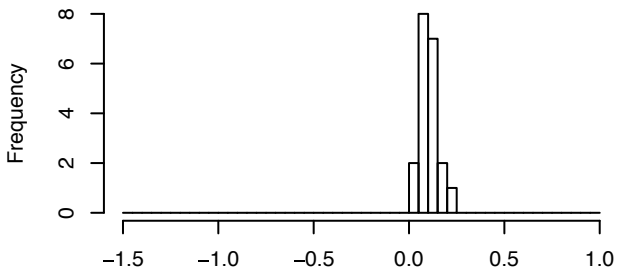

Supplement: elife-58061-supp5.pdf [file elife-58061-supp5.pdf]
